# Supplementary material for: Evidence on Technology-Based Psychological Interventions in Diagnosed Depression: Systematic Review
Source: PubMed Central journal article supplement (PMC7904404; doi:10.2196/21700), 2021-02-10
Supplement: mental_v8i2e21700_app1.pdf [file mental_v8i2e21700_app1.pdf]

**Appendix 1.** Study characteristics.

| Study ID<br>(Author /<br>year /<br>reference) | Location<br>of study | N   | Study arms                                                                                                    | Trial<br>registration<br>/ study<br>protocol | Recruitment                                                                                            | Depression<br>Diagnosis                                                                                                 | Clinical phase<br>of depression<br>management | Implementat<br>ion in<br>mental<br>health care | Age –<br>M (SD) | Sex (% of<br>females) | Primary<br>outcome<br>applicability<br>for meta-<br>analysis |                                               |
|-----------------------------------------------|----------------------|-----|---------------------------------------------------------------------------------------------------------------|----------------------------------------------|--------------------------------------------------------------------------------------------------------|-------------------------------------------------------------------------------------------------------------------------|-----------------------------------------------|------------------------------------------------|-----------------|-----------------------|--------------------------------------------------------------|-----------------------------------------------|
|                                               |                      |     |                                                                                                               |                                              |                                                                                                        |                                                                                                                         |                                               |                                                |                 |                       | PT-<br>Depres<br>sion<br>scores<br>(yes /<br>no)             | PT-<br>Drop-<br>out<br>rates<br>(yes /<br>no) |
| Agyapong<br>(2017) [35]                       | Canada               | 73  | 1) Supportive text<br>messages<br>2) control text<br>messages                                                 | no / no                                      | Secondary care<br>(recruited via four<br>community<br>mental health<br>care clinics)                   | MDD                                                                                                                     | Acute<br>treatment                            | Stand-alone<br>intervention                    | ND              | 68.5                  | yes                                                          | yes                                           |
| Andersson<br>(2013) [36]                      | Sweden               | 69  | 1) Internet-based<br>cognitive<br>behavioral therapy<br>2) in-person group<br>cognitive<br>behavioral therapy | no / no                                      | Community<br>(advertisements)                                                                          | MDD (71.0% in<br>recurrent<br>episode, 1.45% in<br>single episode,<br>Dysthymia (6.0%),<br>MDD plus<br>dysthymia 21.7%) | Acute<br>treatment                            | Stand-alone<br>intervention                    | 42.3<br>(13.5)  | 78.3                  | yes                                                          | yes                                           |
| Arjadi (2018)<br>[37]                         | Indonesi<br>a        | 313 | 1) Internet-based<br>behavioral<br>activation<br>intervention<br>2) Online<br>psychoeducation                 | yes / yes                                    | Community<br>(advertisements)<br>& referrals from<br>institutions or<br>mental health<br>professionals | MDD (mild<br>(24.16%),<br>moderate<br>(31.19%), severe<br>40.89%, based on<br>PHQ-9)                                    | Acute<br>treatment                            | Stand-alone<br>intervention                    | ND              | 80.8                  | yes                                                          | yes                                           |

|                       |                      |     |                                                                                                                                              |           |                                                         |                                                                                                                                                                                  |                 |                          |             |      |     |     |
|-----------------------|----------------------|-----|----------------------------------------------------------------------------------------------------------------------------------------------|-----------|---------------------------------------------------------|----------------------------------------------------------------------------------------------------------------------------------------------------------------------------------|-----------------|--------------------------|-------------|------|-----|-----|
| Berger (2011) [38]    | Switzerland, Germany | 76  | 1) Guided internet-based CBT<br>2) unguided internet-based CBT<br>3) waiting list                                                            | no / no   | Community (advertisements)                              | MDD, Dysthymia (9.2%); MDD severity (mild (22.4%), moderate (60.5%), severe (7.9%), based on BDI-II scores)                                                                      | Acute treatment | Stand-alone intervention | 38.8 (14.0) | 69.7 | yes | yes |
| Berger (2018) [39]    | Germany              | 98  | 1) regular f2f psychotherapy plus internet-based CBT (Deprexis)<br>2) regular f2f psychotherapy                                              | yes / yes | Secondary care (outpatient psychotherapeutic practices) | (ICD-10; F32.- Depressive Episode, F33.- Recurrent Depressive Disorder, F34.- Persistent Affective Disorder, F38.- Other Affective Disorder, F39 Unspecified Affective Disorder) | Acute treatment | Blended treatment        | 43.1 (12.0) | 66.3 | yes | no  |
| Blackwell (2015) [40] | UK                   | 150 | 1) imagery cognitive bias modification<br>2) control condition (without training contingency, which was provided for other intervention arm) | yes / no  | Community (advertisements)                              | MDD                                                                                                                                                                              | Acute treatment | Stand-alone intervention | ND          | 68.7 | yes | yes |
| Bowers (1993) [41]    | USA                  | 22  | 1) TAU<br>2) TAU plus therapist delivered CBT                                                                                                | no / no   | Secondary care (inpatient psychiatry service)           | MDD                                                                                                                                                                              | Acute treatment | Blended treatment        | ND          | 68.2 | yes | no  |

|                       |           |     |                                                                                                                                                                     |          |                                               |                                                                 |                 |                                   |               |      |     |     |
|-----------------------|-----------|-----|---------------------------------------------------------------------------------------------------------------------------------------------------------------------|----------|-----------------------------------------------|-----------------------------------------------------------------|-----------------|-----------------------------------|---------------|------|-----|-----|
|                       |           |     | 3) TAU plus computer assisted CBT                                                                                                                                   |          |                                               |                                                                 |                 |                                   |               |      |     |     |
| Carlbring (2013) [42] | Sweden    | 80  | 1) Computer-administered therapy<br>2) waiting list                                                                                                                 | no / no  | Community (advertisement)                     | MDD                                                             | Acute treatment | Stand-alone intervention          | 44.50 (13.50) | 82.5 | yes | no  |
| Celano (2017) [43]    | USA       | 65  | 1) Positive psychology<br>2) cognition focused condition                                                                                                            | yes / no | Secondary care (inpatient psychiatric units)  | MDD                                                             | Acute treatment | Enhanced stand-alone intervention | ND            | 69.2 | yes | no  |
| Choi (2012) [44]      | Australia | 63  | 1) Internet-based CBT (attuned to Chinese people with depression living in Australia)<br>2) waiting list                                                            | yes / no | Community (online recruitment)                | MDD                                                             | Acute treatment | Stand-alone intervention          | 39.0 (11.7)   | 80   | yes | no  |
| Choi (2014) [45]      | USA       | 158 | 1) Videoconferencing problem solving therapy, 2) face-to-face problem solving therapy<br>3) telephone support calls                                                 | no / no  | Recruited by case managers                    | MDD (65.2%), depressive disorder, NOS (29.7%), dysthymia (5.1%) | Acute treatment | Stand-alone intervention          | 64.80 (9.18)  | 78.5 | yes | yes |
| Corruble (2016) [46]  | France    | 221 | 1) Social rhythm therapy plus face-to-face treatment with a psychiatrist and antidepressant medication<br>2) clinical management plus face-to-face treatment with a | yes / no | Secondary care (psychiatrists of outpatients) | MDD                                                             | Acute treatment | Blended treatment                 | ND            | ND   | no  | no  |

|                     |             |     |                                                                                                                                        |           |                                                                                            |                                             |                 |                                                                     |               |      |     |     |
|---------------------|-------------|-----|----------------------------------------------------------------------------------------------------------------------------------------|-----------|--------------------------------------------------------------------------------------------|---------------------------------------------|-----------------|---------------------------------------------------------------------|---------------|------|-----|-----|
|                     |             |     | psychiatrist and antidepressant medication<br>3) TAU (posteriori matched control group)                                                |           |                                                                                            |                                             |                 |                                                                     |               |      |     |     |
| Egede (2015) [47]   | USA         | 241 | 1) Videoconferencing behavioral activation treatment<br>2) face-to-face behavioral activation treatment                                | yes / yes | Institutional (veterans affairs medical center), secondary care (outpatient based clinics) | MDD                                         | Acute treatment | Stand-alone intervention                                            | 63.90 (5.10)  | 2    | no  | yes |
| Forand (2018) [48]  | USA         | 90  | 1) Internet-based CBT<br>2) waiting list                                                                                               | yes / no  | Community (advertisements)                                                                 | MDD (98%)                                   | Acute treatment | Stand-alone intervention                                            | ND            | 75   | yes | no  |
| Forsell (2017) [49] | Sweden      | 42  | 1) Internet-based CBT plus antenatal TAU<br>2) antenatal TAU                                                                           | yes / no  | Community (advertisements)                                                                 | MDD                                         | Acute treatment | Enhanced stand-alone intervention                                   | ND            | 100  | yes | no  |
| Gilbody (2016) [50] | UK          | 691 | 1) Internet-based CBT (Beating the Blues) plus usual GP care<br>2) internet-based CBT (MoodGYM) plus usual GP care<br>3) usual GP care | yes / yes | Primary care (general practices)                                                           | MDD (81%)                                   | Acute treatment | Enhanced stand-alone intervention                                   | 39.86 (12.65) | 67   | yes | no  |
| Graaf (2009) [51]   | Netherlands | 303 | 1) Internet-based CBT plus TAU<br>2) internet-based CBT<br>3) TAU                                                                      | yes / yes | Community (advertisement, invitation)                                                      | Recurrent MDD (36.30%), single MDD (43.56%) | Acute treatment | 1) Enhanced stand-alone intervention<br>2) stand-alone intervention | ND            | 56.8 | yes | no  |

|                        |        |     |                                                                                                                                           |          |                                                                                                       |                                                                                                 |                 |                             |               |      |     |     |
|------------------------|--------|-----|-------------------------------------------------------------------------------------------------------------------------------------------|----------|-------------------------------------------------------------------------------------------------------|-------------------------------------------------------------------------------------------------|-----------------|-----------------------------|---------------|------|-----|-----|
| Holländare (2011) [16] | Sweden | 84  | 1) Internet-based CBT<br>2) possibility of non-specific e-mail support                                                                    | no / no  | Community (advertisements)                                                                            | MDD (100% in partial remission with no current episode of MDD at the time of recruitment)       | Aftercare       | Stand-alone intervention    | 45.3 (12.8)   | 84.5 | yes | yes |
| Hunkeler (2012) [52]   | USA    | 103 | 1) Collaborative care website plus usual specialty mental health care<br>2) usual specialty mental health care                            | no / no  | Secondary care (mental health care clinics)                                                           | Recurrent MDD                                                                                   | Acute treatment | Collaborative care approach | ND            | 79.6 | yes | no  |
| Johansson (2012) [53]  | Sweden | 92  | 1) Internet-based psychodynamic treatment<br>2) structured support control group                                                          | yes / no | Community (advertisement) and recruitment from a waiting list of another trial group                  | Acute MDD (65.2%), partial remitted MDD (34.8%)                                                 | Acute treatment | Stand-alone intervention    | 45.60 (14.0)  | 75   | yes | no  |
| Johansson (2012) [54]  | Sweden | 121 | 1) Tailored internet-based CBT<br>2) standardized internet-based CBT<br>3) participation in online discussion group during waiting period | yes / no | Community (advertisement) and recruitment from online waiting list of people being interested in iCBT | Acute MDD (73.6%), partial remitted MDD (26.4%), dysthymia (14.0%)                              | Acute treatment | Stand-alone intervention    | 44.70 (12.10) | 71.1 | yes | no  |
| Johansson (2013) [55]  | Sweden | 100 | 1) Internet-based psychodynamic treatment<br>2) waiting list plus continuous contact with therapist                                       | yes / no | Community (advertisement)                                                                             | Depression and anxiety disorders, data are reported separately for the depressed subgroup (MDD) | Acute treatment | Stand-alone intervention    | ND            | ND   | yes | no  |

|                     |             |     |                                                                                                                                        |           |                                                                                                  |                                                                                                                                                                      |                         |                                   |             |      |     |     |
|---------------------|-------------|-----|----------------------------------------------------------------------------------------------------------------------------------------|-----------|--------------------------------------------------------------------------------------------------|----------------------------------------------------------------------------------------------------------------------------------------------------------------------|-------------------------|-----------------------------------|-------------|------|-----|-----|
| Kenter (2016) [32]  | Netherlands | 269 | 1) Internet-based problem solving therapy<br>2) waitlist plus self-help book                                                           | yes / yes | Secondary care (outpatient clinics)                                                              | MDD                                                                                                                                                                  | Bridging waiting period | Stand-alone intervention          | 38.0 (11.4) | 53.9 | yes | no  |
| Kessler (2009) [56] | UK          | 297 | 1) Online CBT plus usual GP care<br>2) usual GP care while on waitlist                                                                 | yes / no  | Primary care (general practices)                                                                 | MDD (mild (5.1%), moderate (26.26%), severe (68.69%), based on BDI score)                                                                                            | Acute treatment         | Enhanced stand-alone intervention | ND          | 68.0 | yes | no  |
| Kivi (2014) [57]    | Sweden      | 92  | 1) Internet-based CBT<br>2) TAU                                                                                                        | no / no   | Primary care (via general practitioners and nurses at primary care centers)                      | MDD (mild (19%), moderate (34%), severe (41%), based on BDI-II cut-off scores)                                                                                       | Acute treatment         | Stand-alone intervention          | 36.6 (11.3) | 66   | yes | no  |
| Kok (2015) [29]     | Netherlands | 239 | 1) Cognitive therapy plus Mood Monitoring plus TAU<br>2) TAU                                                                           | yes / yes | Community (via media), primary care (general practitioners), and mental health care institutions | recurrent MDD (with remission/recovery for at least 2 months; mild (23.43%), moderate (53.14%), severe (22.59%), based on the number of SCID-I depression symptoms)) | Aftercare               | Enhanced stand-alone intervention | ND          | 74.9 | yes | yes |
| Hirsch (2018) [58]  | UK          | 79  | 1) Online Cognitive Bias Modification with or, 2) without priming of repetitive negative thinking<br>3) Neutral task control condition | no / yes  | Community (via advertisements)                                                                   | GAD or MDD (outcome data was reported separately)                                                                                                                    | Acute treatment         | Stand-alone intervention          | ND          | 78.5 | yes | no  |

|                         |         |     |                                                                                                                                   |           |                                                                                             |                                                                              |                 |                                   |               |      |     |     |
|-------------------------|---------|-----|-----------------------------------------------------------------------------------------------------------------------------------|-----------|---------------------------------------------------------------------------------------------|------------------------------------------------------------------------------|-----------------|-----------------------------------|---------------|------|-----|-----|
| Lam (2013) [59]         | Canada  | 105 | 1) Telephone CBT plus medication, 2) medication plus adherence reminder                                                           | yes / no  | Community (advertisement), primary and / or secondary care (referrals)                      | Single MDD (33.33%), recurrent MDD (66.66%)                                  | Acute treatment | Blended treatment                 | ND            | 54.6 | yes | yes |
| Lang (2012) [60]        | UK      | 28  | 1) Imagery-focused cognitive Bias modification, 2) Control condition with same stimulus material, but with modified contingencies | no / no   | Community (advertisement), primary care (local clinicians)                                  | MDD                                                                          | Acute treatment | Stand-alone intervention          | ND            | 76.9 | yes | no  |
| Lappalainen (2015) [61] | Finland | 39  | 1) Internet-based acceptance and commitment therapy<br>2) waiting list                                                            | no / no   | Community (advertisements)                                                                  | MDD (mild (25.6%), moderate (43.6%), severe (17.9%), based on BDI-II scores) | Acute treatment | Stand-alone intervention          | 51.89 (12.88) | 71.8 | yes | no  |
| Lindner (2014) [62]     | Sweden  | 38  | 1) Self-help program plus telephone support by therapist<br>2) Self-help program plus e-mail support by therapist                 | no / no   | Community (from waiting list of previous study which was recruited from the general public) | MDD (84.2%), MDD + Dysthymia (15.8%)                                         | Acute treatment | Stand-alone intervention          | ND            | 84.2 | yes | yes |
| Löbner (2018) [63]      | Germany | 647 | 1) Online CBT plus TAU<br>2) TAU                                                                                                  | yes / no  | Primary care (general practices)                                                            | MDD                                                                          | Acute treatment | Enhanced stand-alone intervention | ND            | 68.5 | no  | no  |
| Luxton (2016) [64]      | USA     | 121 | 1) In Home treatment<br>2) in-person treatment                                                                                    | yes / yes | Institutional (via military treatment facilities)                                           | MDD (9% suffered from minor depression)                                      | Acute treatment | Stand-alone intervention          | ND            | 18.2 | yes | yes |

|                     |           |     |                                                                                                                              |           |                                                                                        |                                                                                              |                 |                                   |               |      |     |     |
|---------------------|-----------|-----|------------------------------------------------------------------------------------------------------------------------------|-----------|----------------------------------------------------------------------------------------|----------------------------------------------------------------------------------------------|-----------------|-----------------------------------|---------------|------|-----|-----|
| Ly (2014) [65]      | Sweden    | 84  | 1) Smartphone-based BA intervention<br>2) smartphone-based mindfulness intervention                                          | yes / no  | Community (advertisement, mass media)                                                  | MDD, MDD and Dysthymia (49%)                                                                 | Acute treatment | Stand-alone intervention          | 36.10 (10.80) | 70   | yes | yes |
| Ly (2015) [66]      | Sweden    | 93  | 1) Blended treatment (face-to-session plus smartphone application that were used between the sessions)<br>2) Face-to-face BA | yes / no  | Community (advertisement)                                                              | MDD                                                                                          | Acute treatment | Blended treatment                 | 30.60 (11.40) | 69.9 | yes | yes |
| Mantani (2017) [67] | Japan     | 164 | 1) Smartphone CBT plus medication change<br>2) medication change alone                                                       | yes / yes | Secondary care (psychiatrists)                                                         | MDD                                                                                          | Acute treatment | Blended treatment                 | ND            | 53.1 | yes | yes |
| Meyer (2015) [68]   | Germany   | 163 | 1) Internet-based CBT plus permission of using TAU, 2) TAU                                                                   | yes / no  | Recruitment from another trial (, as depressive symptoms were beyond mild to moderate) | MDD (37.2%), Dysthymia (10.4%), MDD and Dysthymia (39.3%), Neither MDD nor Dysthymia (12.9%) | Acute treatment | Enhanced stand-alone intervention | 42.0 (11.39)  | 74.8 | yes | no  |
| Milgrom (2016) [69] | Australia | 43  | 1) Internet-based CBT<br>2) TAU                                                                                              | yes / no  | Community (advertisements)                                                             | Recurrent MDD (67.44%), single MDD (32.26%)                                                  | Acute treatment | Stand-alone intervention          | ND            | 100  | yes | no  |
| Mohr (2011) [70]    | USA       | 85  | 1) Telephone CBT<br>2) TAU                                                                                                   | yes / no  | Secondary care (community-based outpatient clinics)                                    | MDD                                                                                          | Acute treatment | Stand-alone intervention          | 55.90 (10.59) | 9.4  | yes | no  |



|                           |        |     |                                                                                                                                                          |           |                                                                                         |     |                 |                                   |              |      |     |     |
|---------------------------|--------|-----|----------------------------------------------------------------------------------------------------------------------------------------------------------|-----------|-----------------------------------------------------------------------------------------|-----|-----------------|-----------------------------------|--------------|------|-----|-----|
| Mohr (2012) [71]          | USA    | 325 | 1) Face-to-face CBT<br>2) Telephone CBT                                                                                                                  | yes / no  | Primary care (primary care clinics), secondary care (general internal medicine clinics) | MDD | Acute treatment | Stand-alone intervention          | ND           | 77.5 | no  | yes |
| Mohr (2013) [72]          | USA    | 102 | 1) Guided internet-based CBT<br>2) unguided internet-based CBT<br>3) waiting list                                                                        | yes / yes | Secondary care (advertisements in general internal medicine clinic)                     | MDD | Acute treatment | Enhanced stand-alone intervention | ND           | 71.4 | no  | no  |
| Montero-Marín (2016) [73] | Spain  | 296 | 1) Self-guided online program plus improved TAU<br>2) therapist-guided online program plus improved TAU<br>3) improved TAU                               | yes / yes | Primary care (general practitioners)                                                    | MDD | Acute treatment | Blended treatment                 | 43.19 (9.3)  | 79.2 | yes | no  |
| Nakao (2018) [74]         | Japan  | 40  | 1) Blended CBT plus continuation with TAU with their treating psychiatrist<br>2) waiting list and continuation with TAU with their treating psychiatrist | yes / no  | Primary care (general hospital), secondary care (teaching and psychiatric hospital)     | MDD | Acute treatment | Blended treatment                 | 40.20 (9.70) | 50   | yes | no  |
| Nyström (2017) [75]       | Sweden | 312 | 1) Physical activity without rationale<br>2) physical activity with rationale, 3) BA based on Lewinsohn's model                                          | yes / yes | Community (advertisement)                                                               | MDD | Acute treatment | Stand-alone intervention          | 42.0 (13.5)  | 76   | yes | yes |

|                      |           |     |                                                                                                                                                                                |           |                                             |                                                                                                             |                 |                             |               |      |     |     |
|----------------------|-----------|-----|--------------------------------------------------------------------------------------------------------------------------------------------------------------------------------|-----------|---------------------------------------------|-------------------------------------------------------------------------------------------------------------|-----------------|-----------------------------|---------------|------|-----|-----|
|                      |           |     | 4) BA based on Martell's model, 5) waiting list                                                                                                                                |           |                                             |                                                                                                             |                 |                             |               |      |     |     |
| O'Mahen (2014) [76]  | UK        | 83  | 1) BA<br>2) TAU                                                                                                                                                                | no / no   | Community (advertisements)                  | MDD                                                                                                         | Acute treatment | Stand-alone intervention    | ND            | 100  | yes | no  |
| Perini (2009) [17]   | Australia | 48  | 1) Online CBT<br>2) waiting list                                                                                                                                               | yes / no  | Community (website)                         | MDD                                                                                                         | Acute treatment | Stand-alone intervention    | 49.29 (12.06) | 77.8 | yes | no  |
| Reins (2019) [77]    | Germany   | 131 | 1) Internet-based CBT<br>2) online psychoeducation                                                                                                                             | yes / yes | Community (advertisement)                   | MDD                                                                                                         | Acute treatment | Stand-alone intervention    | 41.60 (10.80) | 75.6 | yes | yes |
| Ren (2016) [78]      | China     | 62  | 1) Internet-based CBT<br>2) waiting list                                                                                                                                       | no / no   | Institutional (via colleges / universities) | MDD                                                                                                         | Acute treatment | Stand-alone intervention    | ND            | ND   | yes | yes |
| Richards (2013) [79] | UK        | 581 | 1) Collaborative care intervention plus TAU<br>2) TAU                                                                                                                          | yes / no  | Primary care (general practices)            | MDD (mild (14.3%), moderate (55.6%), severe (29.9%), based on ICD-10 diagnosis)                             | Acute treatment | Collaborative care approach | 44.80 (13.30) | 71.9 | yes | no  |
| Rollman (2018) [80]  | USA       | 704 | 1) Internet-based CBT supported by collaborative care manager<br>2) Internet-based CBT supported by collaborative care manager plus access to internet support group<br>3) TAU | yes / yes | Primary care (primary care offices)         | MDD (81.2%), generalized anxiety disorder (53.5%), panic disorder (15.8%), MDD and anxiety disorder (72.3%) | Acute treatment | Collaborative care approach | 42.70 (14.30) | 79.8 | no  | no  |
| Rosso (2017) [81]    | USA       | 77  | 1) Internet-based CBT<br>2) monitored attention control                                                                                                                        | yes / no  | Community (advertisement)                   | Recurrent MDD (74.02%), single MDD (25.97%)                                                                 | Acute treatment | Stand-alone intervention    | ND            | 68.8 | yes | yes |

|                       |           |     |                                                                                                                  |          |                                                        |                                            |                 |                          |              |       |     |     |
|-----------------------|-----------|-----|------------------------------------------------------------------------------------------------------------------|----------|--------------------------------------------------------|--------------------------------------------|-----------------|--------------------------|--------------|-------|-----|-----|
| Sandoval (2017) [82]  | USA       | 45  | 1) Interactive media-based, computer-delivered depression treatment program<br>2) no treatment control condition | no / no  | Community (announcements)                              | MDD (95%), dysthymia (5%)                  | Acute treatment | Stand-alone intervention | ND           | 62.22 | yes | no  |
| Schlicker (2018) [30] | Germany   | 226 | 1) Standardized text message intervention<br>2) individualized text messages<br>3) waiting control               | yes / no | Secondary care (mental health hospital)                | MDD                                        | Aftercare       | Stand-alone intervention | ND           | 64.2  | yes | yes |
| Schuver (2016) [83]   | USA       | 40  | 1) Yoga intervention<br>2) walking control                                                                       | yes / no | Community (advertisement)                              | MDD                                        | Acute treatment | Stand-alone intervention | 42.68 (4.95) | 100   | yes | no  |
| Selmi (1990) [84]     | USA       | 36  | 1) Computer-administered therapy<br>2) therapist-administered therapy<br>3) waiting list                         | no / no  | Community (announcement)                               | recurrent MDD (19.44%), single MDD (80,56) | Acute treatment | Stand-alone intervention | 28.2 (4.58)  | 63.9  | yes | no  |
| Smith (2017) [85]     | Australia | 270 | 1) Internet-based CBT, 2) self-help book (CBT), 3) self-help book (meditation), 4) waiting list                  | yes / no | Community (advertisement) and via virtualclinic.org.au | MDD                                        | Acute treatment | Stand-alone intervention | ND           | 81.9  | yes | no  |

|                       |           |     |                                                                                                                  |          |                                                                                         |                                                                 |                 |                          |               |      |     |     |
|-----------------------|-----------|-----|------------------------------------------------------------------------------------------------------------------|----------|-----------------------------------------------------------------------------------------|-----------------------------------------------------------------|-----------------|--------------------------|---------------|------|-----|-----|
| Steinmann (2020) [15] | Germany   | 59  | 1) Telephone CBT with reminding letters<br>2) telephone CBT without reminding letters                            | yes / no | Primary care (general practitioner)                                                     | MDD                                                             | Acute treatment | Stand-alone intervention | 45.50 (13.60) | 72   | yes | yes |
| Thase (2018) [86]     | USA       | 154 | 1) Blended CBT treatment<br>2) face-to-face CBT                                                                  | no / no  | Community (advertisements) and institutional (clinical services of participating sites) | MDD                                                             | Acute treatment | Blended treatment        | 46.30 (14.30) | 66.2 | yes | yes |
| Titov (2010) [87]     | Australia | 141 | 1) Internet-based CBT plus technician support<br>2) Internet-based CBT plus clinician support<br>3) waiting list | yes / no | virtualclinic.org.au                                                                    | MDD                                                             | Acute treatment | Stand-alone intervention | 43.00 (12.86) | 74   | yes | no  |
| Titov (2011) [88]     | Australia | 77  | 1) Internet-based CBT<br>2) waiting list                                                                         | yes / no | virtualclinic.org.au                                                                    | MDD (51%) (results for depression subgroup reported separately) | Acute treatment | Stand-alone intervention | 43.9 (14.6)   | 73   | yes | no  |
| Torkan (2014) [89]    | Iran      | 39  | 1) Positive imagery cognitive bias modification, 2) non-imagery control condition                                | no / no  | Secondary care (outpatient clinics)                                                     | MDD                                                             | Acute treatment | Stand-alone intervention | ND            | 64.1 | yes | no  |

|                      |           |     |                                                                                           |          |                                      |                                                                                      |                 |                                   |               |      |     |     |
|----------------------|-----------|-----|-------------------------------------------------------------------------------------------|----------|--------------------------------------|--------------------------------------------------------------------------------------|-----------------|-----------------------------------|---------------|------|-----|-----|
| Vernmark (2010) [90] | Sweden    | 88  | 1) Email therapy, 2) internet-based, CBT<br>3) waiting list                               | no / no  | Community (advertisement)            | MDD                                                                                  | Acute treatment | Stand-alone intervention          | 36.82 (12.90) | 68.2 | yes | no  |
| Watkins (2012) [91]  | UK        | 121 | 1) Cognitive bias modification plus TAU<br>2) relaxation training plus TAU<br>3) TAU      | yes / no | Primary care (general practitioners) | MDD                                                                                  | Acute treatment | Enhanced stand-alone intervention | ND            | 71.9 | yes | no  |
| Watts (2013) [92]    | Australia | 52  | 1) Mobile-based intervention (via an application)<br>2) computer-based intervention       | yes / no | virtualclinic.org.au                 | MDD (mild (50%), moderate (23.53%), severe (14.71%), based on PHQ-9 Severity Status) | Acute treatment | Stand-alone intervention          | 41.00 (12.38) | 80   | yes | yes |
| Williams (2013) [93] | Australia | 69  | 1) imagery-focused cognitive bias modification plus internet-based CBT<br>2) waiting list | yes / no | virtualclinic.org.au                 | MDD                                                                                  | Acute treatment | Stand-alone intervention          | ND            | 76.2 | yes | yes |

|                       |           |      |                                                                                                                                                     |           |                                                                     |                                                                                                                                                         |                 |                          |               |      |     |     |
|-----------------------|-----------|------|-----------------------------------------------------------------------------------------------------------------------------------------------------|-----------|---------------------------------------------------------------------|---------------------------------------------------------------------------------------------------------------------------------------------------------|-----------------|--------------------------|---------------|------|-----|-----|
| Williams (2015) [94]  | Australia | 121  | 1) Positive imagery cognitive bias modification plus internet-based CBT<br>2) control cognitive bias modification condition plus internet-based CBT | yes / yes | Institutional (not-for-profit clinical and research unit)           | MDD                                                                                                                                                     | Acute treatment | Stand-alone intervention | ND            | 73.3 | yes | no  |
| Wright (2005) [95]    | USA       | 45   | 1) Blended cognitive therapy<br>2) face-to-face cognitive therapy,<br>3) waiting list                                                               | no / no   | Community (advertisement), primary and/or secondary care (referral) | single MDD                                                                                                                                              | Acute treatment | Blended treatment        | ND            | 75.6 | yes | no  |
| Zagorscak (2018) [96] | Germany   | 1089 | 1) Internet-based CBT plus standardized, automated feedback and contact on demand<br>2) internet-based CBT plus semistandardized e-mail feedback    | yes / no  | Institutional (health insurance)                                    | Single MDD (42.1%), remitted MDD (26.2%), dysthymia (8.3%), double depression (5.3%), Bipolar or NOS (6.0%), no current/past affective disorder (12.2%) | Acute treatment | Stand-alone intervention | 45.70 (11.30) | 65.6 | yes | yes |

|                                                                                                                                                                                           |         |     |                                                                                                                                                                                 |           |                                                                         |                                                                                                                                                                        |                 |                                   |              |      |     |    |
|-------------------------------------------------------------------------------------------------------------------------------------------------------------------------------------------|---------|-----|---------------------------------------------------------------------------------------------------------------------------------------------------------------------------------|-----------|-------------------------------------------------------------------------|------------------------------------------------------------------------------------------------------------------------------------------------------------------------|-----------------|-----------------------------------|--------------|------|-----|----|
| Zwerenz (2017) [97]                                                                                                                                                                       | Germany | 611 | 1) Blended treatment (inpatient face-to-face sessions plus internet-based CBT), 2) Active control group (inpatient face-to-face sessions plus online information on depression) | yes / yes | Secondary care (psychosomatic clinic)                                   | Recurrent MDD (65.94%), single MDD (31.88), depression severity: mild (0.01%), moderate (79.91%), severe (16.59%) according to ICD-10 classification.                  | Acute treatment | Blended treatment                 | 47.98 (9.79) | 60.7 | yes | no |
| Zwerenz (2017b) [31]                                                                                                                                                                      | Germany | 82  | 1) Psychodynamic web-based intervention plus mindfulness exercises<br>2) waiting list                                                                                           | yes / yes | Secondary care (after inpatient or day clinic psychotherapy)            | Recurrent MDD (44.93%), single MDD (33.34), dysthymia (5.80); depression severity: mild (4.35%), moderate (56.52%), severe (17.39%) according to ICD-10 classification | Aftercare       | Stand-alone intervention          | ND           | 71   | yes | no |
| <b>13 further published trials were identified in the course of the search update (August 2020) in the Cochrane Central Register of Controlled Trials. Publications are listed below.</b> |         |     |                                                                                                                                                                                 |           |                                                                         |                                                                                                                                                                        |                 |                                   |              |      |     |    |
| Dennis (2020) [98]                                                                                                                                                                        | Canada  | 241 | 1) Telephone interpersonal psychotherapy + locally available standard postpartum care (including postpartum depression service), 2) locally available standard                  | yes / no  | Institutional (public health departments) and community (advertisement) | MDD (postpartum)                                                                                                                                                       | Acute treatment | Enhanced stand-alone intervention | ND           | 100  | yes | no |

|                     |             |     |                                                                                                                          |           |                                                                               |                                                                                                 |                 |                                   |               |       |     |     |
|---------------------|-------------|-----|--------------------------------------------------------------------------------------------------------------------------|-----------|-------------------------------------------------------------------------------|-------------------------------------------------------------------------------------------------|-----------------|-----------------------------------|---------------|-------|-----|-----|
|                     |             |     | postpartum care (including postpartum depression service)                                                                |           |                                                                               |                                                                                                 |                 |                                   |               |       |     |     |
| Flygare (2020) [99] | Sweden      | 95  | 1) Internet-based CBT, 2) online psychoeducation control condition                                                       | no / no   | Primary and secondary care                                                    | MDD (71.6%), dysthymia (9.5%), Depressive Disorder NOS (4.2%), MDD in partial remission (15.8%) | Acute treatment | Stand-alone intervention          | 45.30 (12.20) | 75.80 | yes | yes |
| Gili (2020) [100]   | Spain       | 221 | 1) Online healthy lifestyle program, 2) online mindfulness program, 3) online positive affect promotion, 4) improved TAU | yes / yes | Primary care                                                                  | MDD or dysthymia                                                                                | Acute treatment | Enhanced stand-alone intervention | ND            | 77.8  | no  | yes |
| Hur (2018) [101]    | South Korea | 48  | 1) App-based cognitive restructuring, 2) App-based mood chart control group                                              | no / no   | Secondary care (outpatient psychiatric clinics) and community (advertisement) | Other specified depressive disorder                                                             | Acute treatment | Stand-alone intervention          | ND            | 88.2  | yes | no  |



|                        |             |     |                                        |           |                                                         |                     |                 |                          |    |      |     |     |
|------------------------|-------------|-----|----------------------------------------|-----------|---------------------------------------------------------|---------------------|-----------------|--------------------------|----|------|-----|-----|
| Jannati (2020) [102]   | Iran        | 78  | 1) App-based CBT, 2) waiting list      | yes / no  | Community (online announcements)                        | MDD (postpartum)    | Acute treatment | Stand-alone intervention | ND | 100  | yes | no  |
| Johansson (2019) [108] | Sweden      | 54  | 1) Internet-based CBT, 2) waiting list | no / no   | Secondary care (referral from psychiatric hospital)     | Recurrent MDD (94%) | Acute treatment | Stand-alone intervention | ND | 57.0 | yes | no  |
| Kooistra (2019) [103]  | Netherlands | 103 | 1) Blended CBT, 2) f2f CBT             | yes / yes | Secondary care (routine specialized mental health care) | MDD                 | Acute treatment | Blended treatment        | ND | 63.0 | yes | yes |

|                       |         |     |                                                                                         |           |                                                                                                |                                                                |                 |                                   |             |      |     |     |
|-----------------------|---------|-----|-----------------------------------------------------------------------------------------|-----------|------------------------------------------------------------------------------------------------|----------------------------------------------------------------|-----------------|-----------------------------------|-------------|------|-----|-----|
| Mohr (2019) [33]      | USA     | 312 | 1) Stepped care program (1st step iCBT, 2nd step telephone CBT), 2) telephone CBT alone | yes / no  | Community (advertisement) and health care system data (electronic medical records)             | MDD                                                            | Acute treatment | Stepped care approach             | ND          | 73.4 | yes | yes |
| Oehler (2020) [104]   | Germany | 348 | 1) Internet-based CBT, 2) progressive muscle relaxation control group                   | yes / yes | Community (advertisement)                                                                      | Recurrent MDD (92.51%), single MDD (1.72%), dysthymia (23.92%) | Acute treatment | Stand-alone intervention          | ND          | 78.7 | yes | no  |
| Pfeiffer (2020) [105] | USA     | 330 | 1) Peer-supported cCBT, 2) enhanced usual care                                          | yes / no  | Institutional (veterans affairs medical center and two of their associated outpatient clinics) | MDD                                                            | Acute treatment | Enhanced stand-alone intervention | 51.6 (14.9) | 20.0 | yes | no  |

|                      |         |     |                                                                                     |           |                                                   |     |                 |                          |               |       |    |     |
|----------------------|---------|-----|-------------------------------------------------------------------------------------|-----------|---------------------------------------------------|-----|-----------------|--------------------------|---------------|-------|----|-----|
| Pihlaja (2020) [106] | Finland | 100 | 1) iCBT plus add-on telephone support, 2) iCBT only                                 | yes / no  | Recruitment from another trial                    | MDD | Acute treatment | Stand-alone intervention | 63.11 (11.10) | 66.00 | no | yes |
| Richards (2020) [34] | UK      | 169 | 1) Immediate iCBT (step 2 within a stepped care approach), 2) waiting list          | yes / yes | Routine care                                      | MDD | Acute treatment | Stepped care approach    | ND            | ND    | no | no  |
| Welch (2019) [107]   | USA     | 14  | 1) eCBT plus transcranial direct current stimulation, 2) eCBT plus sham stimulation | no / no   | Community (advertisement) and clinician referrals | MDD | Acute treatment | Stand-alone intervention | 53.21 (12.48) | 85.71 | no | yes |

**Note.** N = Number of participants randomized; M = Mean; SD = Standard deviation; MDD = Major depressive disorder; ND = No data; PHQ-9 = Patient Health Questionnaire 9 item; BDI = Beck Depression Inventory; CBT = Cognitive behavioral therapy; TAU = treatment as usual; NOS = Not otherwise specified; GP = General practitioner; iCBT = Internet-based cognitive behavioral therapy; GAD = Generalized anxiety disorder; BA = behavioral activation; f2f = face-to-face.
