# Supplementary material for: Evidence on Technology-Based Psychological Interventions in Diagnosed Depression: Systematic Review
Source: PubMed Central journal article supplement (PMC7904404; doi:10.2196/21700), 2021-02-10

**Appendix 2.** Risk of bias assessment across all included studies (N=83).

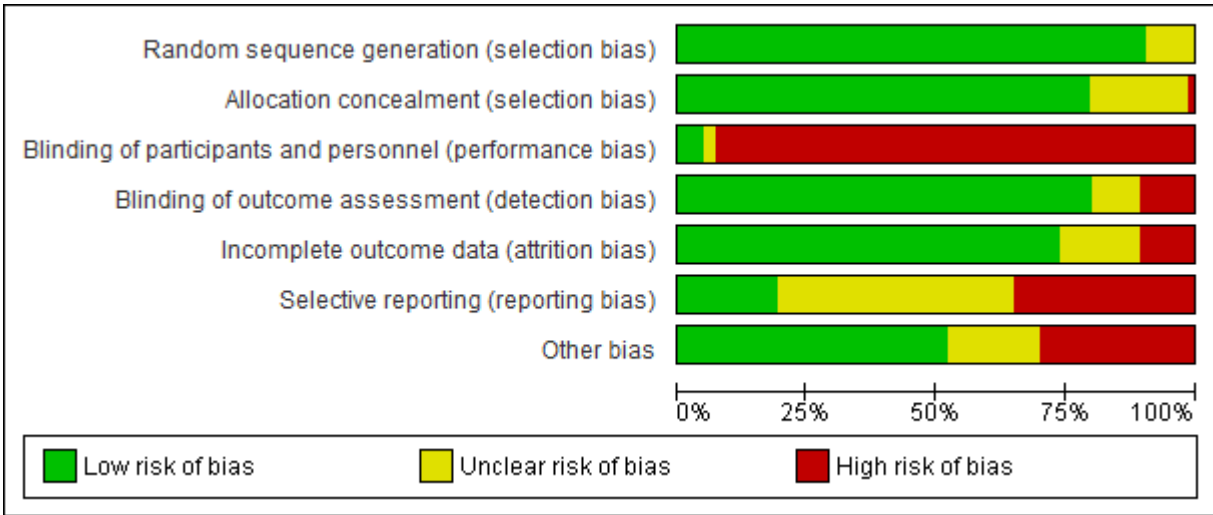

Supplement: mental_v8i2e21700_app2.pdf [file mental_v8i2e21700_app2.pdf]
