# Supplementary material for: Evidence on Technology-Based Psychological Interventions in Diagnosed Depression: Systematic Review
Source: PubMed Central journal article supplement (PMC7904404; doi:10.2196/21700), 2021-02-10
Supplement: mental_v8i2e21700_app3.pdf [file mental_v8i2e21700_app3.pdf]

**Appendix 3.** Treatment characteristics of TBIs.

| Study ID<br>(Author /<br>Year /<br>Reference) | Name of<br>TBI<br>program                       | Study arms                                                                                                    | Technical<br>aspects of TBIs                                                                 | Interventi<br>ons'<br>duration                                     | Amount and role of human support in TBIS |                                                                                                      |                                                                       | Theore<br>tical<br>backgr<br>ound                                                                |                                                                                   |
|-----------------------------------------------|-------------------------------------------------|---------------------------------------------------------------------------------------------------------------|----------------------------------------------------------------------------------------------|--------------------------------------------------------------------|------------------------------------------|------------------------------------------------------------------------------------------------------|-----------------------------------------------------------------------|--------------------------------------------------------------------------------------------------|-----------------------------------------------------------------------------------|
|                                               |                                                 |                                                                                                               |                                                                                              |                                                                    | Applied<br>technologies                  | Interventi<br>ons'<br>duration<br>(in weeks)<br>and<br>planned<br>number of<br>modules /<br>sessions | Degree of<br>guidance <sup>a</sup>                                    |                                                                                                  | Time of<br>therapist's<br>guidance<br>(any information<br>provided by<br>authors) |
| Agyapong<br>(2017) [35]                       | ND                                              | 1) Supportive text<br>messages<br>2) control text<br>messages                                                 | Internet<br>application on<br>mobile phone                                                   | 13.05<br>weeks /<br>two text<br>messages<br>per day for<br>90 days | Self-administered<br>therapy             | Self-<br>administered<br>therapy                                                                     | Self-administered<br>therapy                                          | Self-<br>administered<br>therapy                                                                 | CBT                                                                               |
| Andersson<br>(2013) [36]                      | ND                                              | 1) internet-based<br>cognitive behavioral<br>therapy<br>2) in-person group<br>cognitive behavioral<br>therapy | Internet-<br>delivered text<br>modules                                                       | 8 weeks / 7<br>modules                                             | Predominantly self-<br>help              | 37.9 min per<br>patient in<br>total (SD =<br>11.5)                                                   | providing personalized<br>feedback to homework                        | students at<br>their last term<br>of the clinical<br>psychology<br>program (five-<br>year M.Sc.) | CBT                                                                               |
| Arjadi (2018)<br>[37]                         | Guided Act<br>and Feel<br>Indonesia<br>(GAF-ID) | 1) Internet-based<br>behavioral activation<br>intervention<br>2) online<br>psychoeducation                    | Online program<br>(accessible via<br>computer or<br>mobile device) +<br>telephone<br>support | ND / 8<br>modules                                                  | Predominantly self-<br>help              | 150 min of<br>telephonic<br>support per<br>person in the<br>intervention<br>arms                     | Explaining assignments,<br>providing Feedback,<br>reminding to log in | lay<br>counsellors                                                                               | BA                                                                                |

|                       |                       |                                                                                                                                              |                                                                                    |                                    |                                                          |                                                                                 |                                                                                                                                                                                                                                  |                                                             |                                                      |
|-----------------------|-----------------------|----------------------------------------------------------------------------------------------------------------------------------------------|------------------------------------------------------------------------------------|------------------------------------|----------------------------------------------------------|---------------------------------------------------------------------------------|----------------------------------------------------------------------------------------------------------------------------------------------------------------------------------------------------------------------------------|-------------------------------------------------------------|------------------------------------------------------|
| Berger (2011) [38]    | Deprexis              | 1) Guided internet-based CBT<br>2) unguided internet-based CBT<br>3) waiting list                                                            | 1) & 2), Online intervention                                                       | 10 weeks / 11 modules              | 1) Predominantly self-help, 2) Self-administered therapy | 1) ND, 2) Self-administered therapy                                             | 1) providing feedback, 2) Self-administered therapy                                                                                                                                                                              | 1) master of science students, 2) Self-administered therapy | 1) & 2), CBT                                         |
| Berger (2018) [39]    | Deprexis              | 1) regular f2f psychotherapy plus internet-based CBT (Deprexis)<br>2) regular f2f psychotherapy                                              | Online program                                                                     | 12 weeks (length of Deprexis) / ND | Blended treatment                                        | Blended treatment                                                               | Blended treatment                                                                                                                                                                                                                | Blended treatment                                           | CBT                                                  |
| Blackwell (2015) [40] | ND                    | 1) imagery cognitive bias modification<br>2) control condition (without training contingency, which was provided for other intervention arm) | Online program (access via web browser)                                            | 4 weeks / 12 sessions              | Predominantly self-help                                  | ND                                                                              | brief overview of the intervention; standardized introduction to the intervention; guidance with practice session; help plan the sessions; monitor the adherence/ send emails to remind/ phone calls if someone missed a session | researchers guided participants                             | CBM                                                  |
| Bowers (1993) [41]    | Overcoming Depression | 1) TAU<br>2) TAU plus therapist delivered CBT<br>3) TAU plus computer assisted CBT                                                           | 3) Computer program                                                                | ND / 8 sessions                    | Blended treatment                                        | Blended treatment                                                               | Blended treatment                                                                                                                                                                                                                | Blended treatment                                           | CBT                                                  |
| Carlbring (2013) [42] | Depressionshjälpen    | 1) Computer-administered therapy<br>2) waiting list                                                                                          | 1) Online intervention, CD-ROM (mindfulness and acceptance instructions exercises) | 8 weeks / 7 modules                | Minimal-contact therapy                                  | The mean time per participant was 11.85 min a week, and the total time [...] (M | providing feedback (validating, reinforcement of progress, encouraging to continue with intervention)                                                                                                                            | clinical psychology M.Sc. Students                          | 1) BA with influences from acceptance and commitment |

|                    |                            |                                                                                                          |                                                             |                      |                                                   |                                                                                                                                                                          |                                                                                                                                                                                        |                                                                                                               |                                                              |
|--------------------|----------------------------|----------------------------------------------------------------------------------------------------------|-------------------------------------------------------------|----------------------|---------------------------------------------------|--------------------------------------------------------------------------------------------------------------------------------------------------------------------------|----------------------------------------------------------------------------------------------------------------------------------------------------------------------------------------|---------------------------------------------------------------------------------------------------------------|--------------------------------------------------------------|
|                    |                            |                                                                                                          |                                                             |                      |                                                   | = 94.8; SD = 33.5)                                                                                                                                                       |                                                                                                                                                                                        |                                                                                                               | ment therapy                                                 |
| Celano (2017) [43] | ND                         | 1) Positive psychology<br>2) cognition focused condition                                                 | Telephone                                                   | 6 weeks / 6 sessions | Predominantly therapist-administered intervention | 30 minutes telephone calls per person per week for 6 weeks                                                                                                               | Review of exercise, assignment of next exercise, monitoring of suicidal thoughts                                                                                                       | psychiatrists, psychologists, or licensed social workers trained by principal investigator on both conditions | PP, CF (cognition focused emotionally neutral memory recall) |
| Choi (2012) [44]   | Brighten Your Mood Program | 1) Internet-based CBT (attuned to Chinese people with depression living in Australia)<br>2) waiting list | 1) Online intervention, telephone (for supporting contacts) | 8 weeks / 6 online   | Minimal-contact therapy                           | The mean total support personnel time per Treatment group participant was 97.32 min (SD = 60.76 min) including sending and reading emails, and telephoning participants. | Reinforcement of progress; a summary of the key skills described in the Lesson for that week; normalizing difficulties with treatment; and encouragement to continue with the program. | clinicians                                                                                                    | 1) CBT                                                       |

|                      |    |                                                                                                                                                                                                                                                             |                                    |                                          |                                                          |                                                 |                                                                                    |                                               |                                                                                        |
|----------------------|----|-------------------------------------------------------------------------------------------------------------------------------------------------------------------------------------------------------------------------------------------------------------|------------------------------------|------------------------------------------|----------------------------------------------------------|-------------------------------------------------|------------------------------------------------------------------------------------|-----------------------------------------------|----------------------------------------------------------------------------------------|
| Choi (2014) [45]     | ND | 1) Videoconferencing problem solving therapy<br>2) face-to-face problem solving therapy, 3) telephone support calls                                                                                                                                         | 1) Laptop (Skype),<br>3) telephone | ND / 6 sessions                          | 1), 3) Predominantly therapist-administered intervention | 1) ND, 2) 6 calls (30 minutes) per person       | 1) providing problem solving therapy, 3) providing human contact for control group | 1), 3) licensed master's-level social workers | 1) Problem solving therapy, 3) no specific rationale applied                           |
| Corruble (2016) [46] | ND | 1) Social rhythm therapy plus face-to-face treatment with a psychiatrist and antidepressant medication<br>2) clinical management plus face-to-face treatment with a psychiatrist and antidepressant medication<br>3) TAU (posteriori matched control group) | 1) & 2),<br>Telephone              | 1) 8 weeks / 8 sessions, 2) 8 weeks / ND | 1) & 2), Blended treatment                               | 1) & 2), Blended treatment                      | 1) & 2), Blended treatment                                                         | 1) & 2), Blended treatment                    | 1) Social rhythm therapy, 2) Intensive clinical management (as described in the paper) |
| Egede (2015) [47]    | ND | 1) Videoconferencing behavioral activation treatment<br>2) face-to-face behavioral activation treatment                                                                                                                                                     | 1) Videophone                      | 8 weeks / 8 sessions                     | Predominantly therapist-administered intervention        | Patients had 60 min sessions about once a week. | Providing psychotherapy via videophone                                             | masters-level counsellors                     | 2) Behavioral activation                                                               |

|                     |                                         |                                                              |                                                           |                       |                         |                                                                                                                                                |                                                                                                                                                                                                      |                                 |        |
|---------------------|-----------------------------------------|--------------------------------------------------------------|-----------------------------------------------------------|-----------------------|-------------------------|------------------------------------------------------------------------------------------------------------------------------------------------|------------------------------------------------------------------------------------------------------------------------------------------------------------------------------------------------------|---------------------------------|--------|
| Forand (2018) [48]  | Beating the Blues v2.5 (plus TeleCoach) | 1) Internet-based CBT<br>2) waiting list                     | 1) Online Intervention, telephone (contacts with coaches) | 8 weeks / 8 sessions  | Predominantly self-help | Coaches spent about 1 to 2 hours in total working with each participant.                                                                       | building reciprocity in the coaching relationship, informing the user about expected behaviors, setting expectations for progress, building expectations for accountability, and rewarding adherence | coaches (not further specified) | 1) CBT |
| Forsell (2017) [49] | ND                                      | 1) Internet-based CBT plus antenatal TAU<br>2) antenatal TAU | Online platform                                           | 10 weeks / 10 modules | Minimal-contact therapy | Therapist spent on average a total of 2 h and 30 min (SD = 1 h and 50 min, range 35 min to 6,5 h) per patient over the course of the 10 weeks. | providing regular feedback, encouragements and support in written messages mirroring the interventions                                                                                               | CBT-trained therapist           | CBT    |

|                        |                            |                                                                                                                                          |                                                                 |                                               |                                    |                                                                                                                                                                                                         |                                                                                                     |                                                                                      |              |
|------------------------|----------------------------|------------------------------------------------------------------------------------------------------------------------------------------|-----------------------------------------------------------------|-----------------------------------------------|------------------------------------|---------------------------------------------------------------------------------------------------------------------------------------------------------------------------------------------------------|-----------------------------------------------------------------------------------------------------|--------------------------------------------------------------------------------------|--------------|
| Gilbody (2016) [50]    | Beating the Blues; MoodGYM | 1) Internet-based CBT (Beating the Blues) plus usual GP care<br>2) internet-based CBT (MoodGYM) plus usual GP care),<br>3) usual GP care | 1) & 2), Online intervention, telephone (for technical support) | 1) ND / 8 sessions, 2) ND / 5 sessions        | 1) & 2), Predominantly self-help   | 1) & 2), The total mean number of minutes of technical support calls delivered to participants was 6.2 (2-8) minutes for Beating the Blues participants and 6.5 minutes (2-9) for MoodGYM participants. | 1) & 2), Encouragement to engage with intervention, answering questions related to technical issues | 1) & 2), Trained technicians                                                         | 1) & 2),     |
| Graaf (2009) [51]      | Colour Your Life           | 1) Internet-based CBT plus TAU<br>2) internet-based CBT<br>3) TAU                                                                        | 1) & 2), Online intervention                                    | 1) & 2), ND / 9 sessions                      | 1) & 2), Self-administered therapy | 1) & 2), Self-administered therapy                                                                                                                                                                      | 1) & 2), Self-administered therapy                                                                  | 1) & 2), Self-administered therapy                                                   | 1) & 2), CBT |
| Holländare (2011) [16] | ND                         | 1) Internet-based CBT<br>2) possibility of non-specific e-mail support                                                                   | Internet-based                                                  | 10 weeks / 9 (basic) and 7 (advanced) modules | Minimal-contact therapy            | The mean number of messages from a therapist to a CBT participant was 15.3 (SD 6.3) (range 3–33) at an estimate of 10 min / message, resulting in                                                       | personalized feedback regarding homework and prompts when inactive                                  | clinical psychologists and psychology students after completion of clinical training | CBT          |

|                       |                 |                                                                                                                |                              |                                                     |                                                        |                                                                                                                                                                                                               |                                                                                                                                               |                                                                                |                       |
|-----------------------|-----------------|----------------------------------------------------------------------------------------------------------------|------------------------------|-----------------------------------------------------|--------------------------------------------------------|---------------------------------------------------------------------------------------------------------------------------------------------------------------------------------------------------------------|-----------------------------------------------------------------------------------------------------------------------------------------------|--------------------------------------------------------------------------------|-----------------------|
|                       |                 |                                                                                                                |                              |                                                     |                                                        | approximately 2.5 h of total therapist time / participant.                                                                                                                                                    |                                                                                                                                               |                                                                                |                       |
| Hunkeler (2012) [52]  | eCare for Moods | 1) Collaborative care website plus usual specialty mental health care<br>2) usual specialty mental health care | 1) Online platform           | 52 weeks / ND                                       | Predominantly self-help                                | ND                                                                                                                                                                                                            | reviewing activity, using secure messaging, and responding to alerts automatically generated by participants' answers to monitoring questions | psychiatric nurse care manager (eCare manager)                                 | CBT                   |
| Johansson (2012) [53] | SUBGAP          | 1) Internet-based psychodynamic treatment<br>2) structured support control group                               | 1) Online intervention       | 10 weeks / 9 modules                                | Predominantly self-help                                | As expected, the average therapist time per participant and week was larger in the treatment group compared to the support group (13.2 minutes compared to 4.5 minutes, $t(90) = 8.57$ , $p < 0.001$ ). [...] | providing feedback, administering gradual access to modules                                                                                   | final-semester students from a five-year M.Sc. clinical psychologist programme | Psychodynamic therapy |
| Johansson (2012) [54] | ND              | 1) Tailored internet-based CBT<br>2) standardized internet-based CBT<br>3) participation in online discussion  | 1) & 2), Online Intervention | 1) 10 weeks / 25 chapters, 2) 10 weeks / 8 chapters | 1) Minimal-contact therapy, 2) predominantly self-help | 1) & 2), As expected, since most participants from the tailored                                                                                                                                               | 1) & 2), providing feedback on exercise, answering questions                                                                                  | 1) & 2), MSc-level clinical psychologist                                       | 1) & 2), CBT          |

|                       |    |                                                                                                     |                                                          |                                     |                                                        |                                                                                                                                                                                                   |                                                                                                                                                                                                                                                          |                                                                                                   |                                                            |
|-----------------------|----|-----------------------------------------------------------------------------------------------------|----------------------------------------------------------|-------------------------------------|--------------------------------------------------------|---------------------------------------------------------------------------------------------------------------------------------------------------------------------------------------------------|----------------------------------------------------------------------------------------------------------------------------------------------------------------------------------------------------------------------------------------------------------|---------------------------------------------------------------------------------------------------|------------------------------------------------------------|
|                       |    | group during waiting period                                                                         |                                                          |                                     |                                                        | treatment received more modules, the average therapist time per participant was larger in the tailored group (95.2 minutes) compared to the standardized group (74.1 minutes).                    |                                                                                                                                                                                                                                                          |                                                                                                   |                                                            |
| Johansson (2013) [55] | ND | 1) Internet-based psychodynamic treatment<br>2) waiting list plus continuous contact with therapist | 1) Online intervention<br>2) online contact to therapist | 1) 10 weeks / 8 modules, 2) ND / ND | 1) Minimal-contact therapy, 2) predominantly self-help | 1) In the treatment group, the average therapist time per client and week was 9.5 min (SD = 4.0), 2) The average therapist time per client and week was 2.3 min (SD = 0.86) in the control group. | 1) providing feedback, administering gradual access to modules, 2) providing basic support (empathic listening, asking further questions) without applying specific techniques, symptom monitoring, questions on clients' experiences from previous week | 1) & 2), Master's level students in their last semester of a 5-year clinical psychologist program | 1) Psychodynamic therapy, 2) basic support from therapists |



|                     |                      |                                                                              |                                                            |                        |                                                   |                                                                                                                                                        |                                                                                 |                           |                                                             |
|---------------------|----------------------|------------------------------------------------------------------------------|------------------------------------------------------------|------------------------|---------------------------------------------------|--------------------------------------------------------------------------------------------------------------------------------------------------------|---------------------------------------------------------------------------------|---------------------------|-------------------------------------------------------------|
| Kenter (2016) [32]  | Alles onder Controle | 1) Internet-based problem solving therapy<br>2) waitlist plus self-help book | Online intervention platform                               | 5 weeks / 5 sessions   | Predominantly self-help                           | 15 to 20 min per person per session                                                                                                                    | nontherapeutic feedback helping participants to become familiar with techniques | masters-level students    | PST (using self-examination therapy as a general framework) |
| Kessler (2009) [56] | ND                   | 1) Online CBT plus usual GP care<br>2) usual GP care while on waitlist       | Online intervention (with a therapist online in real time) | 16 weeks / 10 sessions | Predominantly therapist-administered intervention | The intervention comprised up to ten sessions, each of 55 min of CBT delivered online, to be completed within 16 weeks of randomization when possible. | delivery of psychotherapeutic CBT sessions                                      | CBT-trained psychologists | CBT                                                         |

|                    |                     |                                                                                                                                        |                                                                                                       |                             |                         |                                                                                                                                             |                                                                                                                                                                |                                            |                                                                            |
|--------------------|---------------------|----------------------------------------------------------------------------------------------------------------------------------------|-------------------------------------------------------------------------------------------------------|-----------------------------|-------------------------|---------------------------------------------------------------------------------------------------------------------------------------------|----------------------------------------------------------------------------------------------------------------------------------------------------------------|--------------------------------------------|----------------------------------------------------------------------------|
| Kivi (2014) [57]   | Depression shjälpen | 1) Internet-based CBT<br>2) TAU                                                                                                        | Online program, CD (containing mindfulness and acceptance instructions), telephone (contact to coach) | 12 weeks / 7 modules        | Minimal-contact therapy | The therapists were instructed to spend about 15 minutes by secure e-mail and/or telephone with each patient per week // 12x15 =180 minutes | take the role of the 'coach', focus feedback on validating the patient, reinforcing progress, and encouraging the patient to continue working with the program | licensed psychologists or psychotherapists | CBT (consisting of BA, Acceptance and Commitment Therapy, and Mindfulness) |
| Kok (2015) [29]    | ND                  | 1) Cognitive therapy plus Mood Monitoring plus TAU<br>2) TAU                                                                           | Online intervention, telephone (contact to therapist)                                                 | ND / 8 sessions             | Predominantly self-help | The mean amount of total time per therapist per participant during the complete mobile CT was 18 min (SD = 8.2).                            | Therapist support was aimed at working through the modules and finishing the therapy.                                                                          | ND                                         | CT                                                                         |
| Hirsch (2018) [58] | ND                  | 1) Online Cognitive Bias Modification with or, 2) without priming of repetitive negative thinking<br>3) neutral task control condition | Online platform                                                                                       | 3 weeks / 10 sessions       | Predominantly self-help | one in-person visit with participants (pre-training) and subsequent contact                                                                 | Researchers provided instructions for completing the task at home.                                                                                             | ND                                         | CBM                                                                        |
| Lam (2013) [59]    | ND                  | 1) Telephone CBT plus medication                                                                                                       | 1) Telephone                                                                                          | 8 to 10 weeks CBT; 12 weeks | Blended treatment       | Blended treatment                                                                                                                           | Blended treatment                                                                                                                                              | Blended treatment                          | CBT                                                                        |

|                         |                     |                                                                                                                                     |                                                                                                                                                                              |                                  |                           |                                                                                                    |                                                                                                                                   |                                     |                                                                 |
|-------------------------|---------------------|-------------------------------------------------------------------------------------------------------------------------------------|------------------------------------------------------------------------------------------------------------------------------------------------------------------------------|----------------------------------|---------------------------|----------------------------------------------------------------------------------------------------|-----------------------------------------------------------------------------------------------------------------------------------|-------------------------------------|-----------------------------------------------------------------|
|                         |                     | 2) medication plus adherence reminder                                                                                               |                                                                                                                                                                              | escitalopram / 8 sessions of CBT |                           |                                                                                                    |                                                                                                                                   |                                     |                                                                 |
| Lang (2012) [60]        | ND                  | 1) Imagery-focused cognitive Bias modification<br>2) control condition with same stimulus material, but with modified contingencies | Computer program                                                                                                                                                             | 1 weeks / 7 sessions             | Self-administered therapy | Self-administered therapy                                                                          | Self-administered therapy                                                                                                         | Self-administered therapy           | Imagery-focused CBM                                             |
| Lappalainen (2015) [61] | Good Life Compass   | 1) Internet-based acceptance and commitment therapy<br>2) waiting list                                                              | Online intervention                                                                                                                                                          | 7 weeks / 6 modules              | Predominantly self-help   | Coaches were instructed to keep the weekly feedback short, preferably within about 15 min per week | providing written feedback in order to encourage participants to exercises and to give suggestions                                | Master's-level student coaches      | Acceptance and commitment therapy                               |
| Lindner (2014) [62]     | Depression shjälpen | 1) Self-help program plus telephone support by therapist<br>2) Self-help program plus e-mail support by therapist                   | 1) Online program, telephone (contact to therapist), CD-ROM (with mindfulness and acceptance instructions)<br>2) Online program, e-mail (contact to therapist), CD-ROM (with | 8 weeks / 7 modules              | Predominantly self-help   | 15 min/week (approx.) per participant                                                              | Validating the participant's experiences, providing feedback on performed tasks and reinforcing progress and plans of future work | MSc students in clinical psychology | BA (with some influence from acceptance and commitment therapy) |

|                    |         |                                                                                                                              |                                                        |                                                                       |                                                   |                                                                                    |                                                                                                                                    |                                                                                                |                                          |
|--------------------|---------|------------------------------------------------------------------------------------------------------------------------------|--------------------------------------------------------|-----------------------------------------------------------------------|---------------------------------------------------|------------------------------------------------------------------------------------|------------------------------------------------------------------------------------------------------------------------------------|------------------------------------------------------------------------------------------------|------------------------------------------|
|                    |         |                                                                                                                              | mindfulness and acceptance instructions)               |                                                                       |                                                   |                                                                                    |                                                                                                                                    |                                                                                                |                                          |
| Löbner (2018) [63] | MoodGym | 1) Online CBT plus TAU<br>2) TAU                                                                                             | Online program                                         | ND / 5 modules                                                        | Self-administered therapy                         | Self-administered therapy                                                          | Self-administered therapy                                                                                                          | Self-administered therapy                                                                      | CBT                                      |
| Luxton (2016) [64] | ND      | 1) In Home treatment<br>2) in-person treatment                                                                               | 1) Videoconferencing via laptop                        | 8 weeks / 8 sessions                                                  | Predominantly therapist-administered intervention | 50-60-min sessions every week for 8 weeks per person                               | therapy via videoconferencing tools                                                                                                | doctoral-level mental health providers who received training from a BATD expert and consultant | BA                                       |
| Ly (2014) [65]     | ND      | 1) Smartphone-based BA intervention<br>2) smartphone-based mindfulness intervention                                          | 1) Smartphone application<br>2) smartphone application | 8 weeks / 3 chapters                                                  | 1) & 2), Minimal-contact therapy                  | 1) & 2), The therapists reported a span between 2 and 18 min/week and participant. | 1) & 2), encouraging messages, general educational messages + personal feedback on reflections + feedback on activities/ exercises | 1) & 2), final-semester students from a 5-year MSc clinical psychologist programme             | 1) BA, 2) Mindfulness practice programme |
| Ly (2015) [66]     | ND      | 1) Blended treatment (face-to-session plus smartphone application that were used between the sessions)<br>2) Face-to-face BA | 1) Smartphone application                              | 1) 9 weeks / 4 face-to-face sessions (smartphone app was used between | Blended treatment                                 | Blended treatment                                                                  | Blended treatment                                                                                                                  | Blended treatment                                                                              | 1) & 2), BA                              |

|                     |                 |                                                                        |                                                              |                                         |                           |                                                                                                                                                                                     |                                                                                         |                                                                                              |     |
|---------------------|-----------------|------------------------------------------------------------------------|--------------------------------------------------------------|-----------------------------------------|---------------------------|-------------------------------------------------------------------------------------------------------------------------------------------------------------------------------------|-----------------------------------------------------------------------------------------|----------------------------------------------------------------------------------------------|-----|
|                     |                 |                                                                        |                                                              | sessions),<br>2) 10 weeks / 10 sessions |                           |                                                                                                                                                                                     |                                                                                         |                                                                                              |     |
| Mantani (2017) [67] | Kokoro-app      | 1) Smartphone CBT plus medication change<br>2) medication change alone | 1) Smartphone application                                    | 9 weeks / 8 sessions                    | Blended treatment         | Blended treatment                                                                                                                                                                   | Blended treatment                                                                       | Blended treatment                                                                            | CBT |
| Meyer (2015) [68]   | Deprexis        | 1) Internet-based CBT plus permission of using TAU<br>2) TAU           | 1) Online intervention plus daily text messages (optionally) | 13.05 weeks / ND                        | Self-administered therapy | Self-administered therapy                                                                                                                                                           | Self-administered therapy                                                               | Self-administered therapy                                                                    | CBT |
| Milgrom (2016) [69] | MumMood Booster | 1) Internet-based CBT<br>2) TAU                                        | 1) Online intervention                                       | 8 weeks / 6 sessions                    | Minimal-contact therapy   | (Coaches were instructed to spend a maximum of 30 minutes per week per participant). Of the six scheduled coach calls, participants completed a mean 4.3 calls (SD 2.2, range 0-6). | providing assistance and encouragement in the use and practice of particular strategies | coaches were graduate psychology trainees, clinical psychologists, and a health psychologist | CBT |

|                  |             |                                                                                   |                                                                                |                                |                                                          |                                                                                                                                                                  |                                                                                                                                                                                                                                                                                                                                                     |                                                                                     |              |
|------------------|-------------|-----------------------------------------------------------------------------------|--------------------------------------------------------------------------------|--------------------------------|----------------------------------------------------------|------------------------------------------------------------------------------------------------------------------------------------------------------------------|-----------------------------------------------------------------------------------------------------------------------------------------------------------------------------------------------------------------------------------------------------------------------------------------------------------------------------------------------------|-------------------------------------------------------------------------------------|--------------|
| Mohr (2011) [70] | ND          | 1) Telephone CBT<br>2) TAU                                                        | 1) Telephone                                                                   | 20 weeks /<br>16 sessions      | Predominantly therapist-administered intervention        | T-CBT consisted of 16 sessions (45–50 min in length) provided over 20 weeks, allowing 4 weeks for missed sessions.                                               | delivery of CBT via telephone                                                                                                                                                                                                                                                                                                                       | trained cognitive behavioral therapists                                             | CBT          |
| Mohr (2012) [71] | ND          | 1) Face-to-face CBT<br>2) Telephone CBT                                           | 2) Telephone administered intervention                                         | 18 weeks /<br>18 sessions      | Predominantly therapist-administered intervention        | Maximum time: 18(sessions) x 45 minutes = 810 mins                                                                                                               | delivery of CBT via telephone                                                                                                                                                                                                                                                                                                                       | PhD level psychologists                                                             | CBT          |
| Mohr (2013) [72] | MoodManager | 1) Guided internet-based CBT<br>2) unguided internet-based CBT<br>3) waiting list | 1) Online intervention, telephone (contact to coach)<br>2) online intervention | 1) & 2), 12 weeks / 18 lessons | 1) Predominantly self-help, 2) self-administered therapy | 1) The mean engagement session time was 43.6 min, SD = 14.7, while the mean time for follow-up sessions was 8.9 (SD = 4.5) minutes, 2) self-administered therapy | TeleCoaching focused on enhancing adherence to moodManager by establishing a supportive relationship, setting and reviewing login goals, positively reinforcing login and site use, encouraging use of moodManager when login goals were not met, and answering any questions regarding the functionality of the site, 2) self-administered therapy | masters level social workers, PhD level psychologists, 2) self-administered therapy | 1) & 2), CBT |

|                           |                                               |                                                                                                                                                                        |                                                  |                                               |                                                          |                                                                                    |                                                                                                       |                                                           |              |
|---------------------------|-----------------------------------------------|------------------------------------------------------------------------------------------------------------------------------------------------------------------------|--------------------------------------------------|-----------------------------------------------|----------------------------------------------------------|------------------------------------------------------------------------------------|-------------------------------------------------------------------------------------------------------|-----------------------------------------------------------|--------------|
| Montero-Marin (2016) [73] | Smiling is Fun                                | 1) Self-guided online program plus improved TAU<br>2) therapist-guided online program plus improved TAU<br>3) improved TAU                                             | 1) Online intervention<br>2) online intervention | 1) & 2),: 13.05 weeks (estimated) / 10 module | 1) Self-administered therapy, 2) Predominantly self-help | 1) Self-administered therapy, 2) max. 3 e-mails in total (per person)              | 1) Self-administered therapy, 2) answering of questions and providing advice                          | 1) Self-administered therapy, 2) trained psychotherapists | 1) & 2), CBT |
| Nakao (2018) [74]         | Kokoro (web-based CBT programme)              | 1) Blended CBT plus continuation with TAU with their treating psychiatrist<br>2) waiting list and continuation with TAU with their treating psychiatrist               | 1) Online program                                | 12 weeks / 5 core components                  | Blended treatment                                        | Blended treatment                                                                  | Blended treatment                                                                                     | Blended treatment                                         | CBT          |
| Nyström (2017) [75]       | ND                                            | 1) Physical activity without rationale<br>2) physical activity with rationale<br>3) BA based on Lewinshon's model<br>4) BA based on Martell's model<br>5) waiting list | 3)-4) Online intervention                        | 3)-4) 12 weeks / 8 sessions                   | 3)-4) Predominantly self-help                            | 3)-4) therapists were instructed to devote no more than 15 min per week per person | providing feedback                                                                                    | students from the Clinical Psychologists program          | 3)-4) BA     |
| O'Mahen (2014) [76]       | Netmums Helping With Depression (Netmums HWD) | 1) BA<br>2) TAU                                                                                                                                                        | 1) Online treatment, telephone (support)         | ND / 12 sessions                              | Minimal-contact therapy                                  | The average total time of sessions per participant was 253 min                     | answering questions about treatment material and working through barriers to treatment implementation | mental health workers with undergraduate degrees          | BA           |

|                      |                                          |                                                                                                                                            |                                                                                                         |                                  |                                                   |                                                                                                                      |                                                                                                                                                                   |                                                          |           |
|----------------------|------------------------------------------|--------------------------------------------------------------------------------------------------------------------------------------------|---------------------------------------------------------------------------------------------------------|----------------------------------|---------------------------------------------------|----------------------------------------------------------------------------------------------------------------------|-------------------------------------------------------------------------------------------------------------------------------------------------------------------|----------------------------------------------------------|-----------|
| Perini (2009) [17]   | Sadness Program                          | 1) Online CBT<br>2) waiting list                                                                                                           | 1) Online intervention                                                                                  | 8 weeks / 6 sessions             | Minimal-contact therapy                           | 111 min per participant                                                                                              | reinforcement for participation and efforts, encouragement to practice the treatment skills/to complete homework, enquiries about progress, response to questions | clinical psychologist                                    | CBT       |
| Reins (2019) [77]    | GET.ON Mood Enhancer (shortened version) | 1) Internet-based CBT<br>2) online psychoeducation                                                                                         | 1) Online intervention                                                                                  | ND / 6 sessions                  | Minimal-contact therapy                           | on average 2 hours per participant                                                                                   | individualized written feedback after each module                                                                                                                 | psychotherapists-in-training                             | CBT       |
| Ren (2016) [78]      | MoodGym (Chinese version)                | 1) Internet-based CBT<br>2) waiting list                                                                                                   | 1) Online intervention                                                                                  | 3 weeks / 5 sessions             | Self-administered therapy                         | Self-administered therapy                                                                                            | reminder to complete modules                                                                                                                                      | research assistants                                      | CBT       |
| Richards (2013) [79] | ND                                       | 1) Collaborative care intervention plus TAU<br>2) TAU                                                                                      | 1) Telephone                                                                                            | 14 weeks / 6 to 12 contacts      | Predominantly therapist-administered intervention | The mean total time in collaborative care was 3.03 hours (standard deviation 2.18) over a period of 12 weeks (7.75). | depression education, drug management, behavioral activation, relapse prevention, and primary care liaison                                                        | mental health workers in primary care                    | BA        |
| Rollman (2018) [80]  | Beating the Blues                        | 1) Internet-based CBT supported by collaborative care manager<br>2) Internet-based CBT supported by collaborative care manager plus access | 1) Online intervention, telephone (for care managers contact)<br>2) Online intervention, telephone (for | 1) & 2), 26.1 weeks / 8 sessions | 1) & 2), Predominantly self-help                  | 1) & 2), ND                                                                                                          | 1) & 2), review the program, establish rapport, monitor progress, send personalized feedback and encouragement via email/ call                                    | college graduates with mental health research experience | 1),2) CBT |



|                       |                                                                                           |                                                                                                                   |                                                                         |                                     |                                    |                                                                   |                                                                                                                      |                                    |                                           |
|-----------------------|-------------------------------------------------------------------------------------------|-------------------------------------------------------------------------------------------------------------------|-------------------------------------------------------------------------|-------------------------------------|------------------------------------|-------------------------------------------------------------------|----------------------------------------------------------------------------------------------------------------------|------------------------------------|-------------------------------------------|
|                       |                                                                                           | to internet support group<br>3) TAU                                                                               | care managers contact),                                                 |                                     |                                    |                                                                   |                                                                                                                      |                                    |                                           |
| Rosso (2017) [81]     | Sadness Program (adapted to American population, because it is originally from Australia) | 1) Internet-based CBT<br>2) monitored attention control                                                           | 1) Online intervention, telephone (for supporting contacts)             | 10 weeks / 6 lessons                | Predominantly self-help            | weekly 3-5 min calls per person                                   | provide encouragement and support                                                                                    | bachelor-level research assistant  | CBT                                       |
| Sandoval (2017) [82]  | ND                                                                                        | 1) Interactive media-based, computer-delivered depression treatment program,<br>2) no treatment control condition | 1) Computer-delivered intervention (at study site)                      | 6 weeks / 6 sessions                | Self-administered therapy          | Self-administered therapy                                         | Self-administered therapy                                                                                            | Self-administered therapy          | PST                                       |
| Schlicker (2018) [30] | ND                                                                                        | 1) Standardized text message intervention<br>2) individualized text messages, 3) waiting control                  | 1) Text messages via mobile phone,<br>2) text messages via mobile phone | 1) & 2), 6 weeks / 81 text messages | 1) & 2), Self-administered therapy | 1) & 2), Self-administered therapy                                | 1) & 2), Self-administered therapy                                                                                   | 1) & 2), Self-administered therapy | 1) & 2), ART (affect regulation training) |
| Schuver (2016) [83]   | ND                                                                                        | 1) Yoga intervention<br>2) walking control                                                                        | DVD (for Yoga or walking, telephone (for contact to counsellors)        | 12 weeks / 8 sessions               | Predominantly self-help            | theoretical maximum of (8*15min)<br>120 min of therapist guidance | addressing questions and concerns about the DVD, setting goals, introducing and discussing current mindfulness topic | ND                                 | Mindfulness-Bases Stress Reduction (MBSR) |

|                   |                 |                                                                                                       |                                                                                  |                      |                         |                                                                                                                                                                                       |                                                                                                                                                                                                                                                                                                                                         |    |     |
|-------------------|-----------------|-------------------------------------------------------------------------------------------------------|----------------------------------------------------------------------------------|----------------------|-------------------------|---------------------------------------------------------------------------------------------------------------------------------------------------------------------------------------|-----------------------------------------------------------------------------------------------------------------------------------------------------------------------------------------------------------------------------------------------------------------------------------------------------------------------------------------|----|-----|
| Selmi (1990) [84] | ND              | 1) Computer-administered therapy<br>2) therapist-administered therapy<br>3) waiting list              | 1) Computer-delivered intervention (at study site)                               | 6 weeks / 6 sessions | Predominantly self-help | The computer treatment group had some additional contact with the experimenter (about 20 minutes/week) for assessments.                                                               | In the computer condition the patients had only minimal contact with the experimenter, who helped start and end the sessions and, although not in the room while the patient was interacting with the computer, was available to answer questions. Most questions had to do with computer procedures, and contact was kept to a minimum | ND | CBT |
| Smith (2017) [85] | Sadness Program | 1) Internet-based CBT<br>2) self-help book (CBT)<br>3) self-help book (meditation)<br>4) waiting list | 1) Online intervention, optional email/telephone contact to technician/clinician | 12 weeks / 6 modules | Predominantly self-help | The technician spent an average of 9.7 min (SD = 5.02, range =3–21) emailing and calling each participant in the iCBT group during the treatment course (including follow-up period). | Participants were contacted via email or telephone by research staff ('The Technician', JS) after the first two lessons, then as requested, or by a clinician (psychiatry registrar) in response to an increase in distress or suicidal intent.                                                                                         | ND | CBT |

|                       |                       |                                                                                                                  |                                                                            |                                                             |                                                            |                                                                                                                                                      |                                                                                                                                                                                                                                                                             |                                                                                                                                                                               |              |
|-----------------------|-----------------------|------------------------------------------------------------------------------------------------------------------|----------------------------------------------------------------------------|-------------------------------------------------------------|------------------------------------------------------------|------------------------------------------------------------------------------------------------------------------------------------------------------|-----------------------------------------------------------------------------------------------------------------------------------------------------------------------------------------------------------------------------------------------------------------------------|-------------------------------------------------------------------------------------------------------------------------------------------------------------------------------|--------------|
| Steinmann (2020) [15] | ND                    | 1) Telephone CBT with reminding letters<br>2) telephone CBT without reminding letters                            | 1) Telephone-delivered<br>2) telephone delivered                           | 9 to 13 weeks / at least 9 sessions                         | 1) & 2), Predominantly therapist-administered intervention | 1) & 2), approx. 30 minutes per session per person                                                                                                   | 1) & 2), provide psychotherapy by telephone                                                                                                                                                                                                                                 | 1) & 2), licensed CBT-psychotherapists                                                                                                                                        | 1) & 2), CBT |
| Thase (2018) [86]     | Good Days Ahead (GDA) | 1) Blended CBT treatment<br>2) face-to-face CBT                                                                  | 1) Online intervention                                                     | 16 weeks / 9 modules (online) plus 12 face-to-face sessions | Blended treatment                                          | Blended treatment                                                                                                                                    | Blended treatment                                                                                                                                                                                                                                                           | Blended treatment                                                                                                                                                             | CBT          |
| Titov (2010) [87]     | Sadness Program       | 1) Internet-based CBT plus technician support<br>2) Internet-based CBT plus clinician support<br>3) waiting list | 1) & 2), Online intervention, telephone (for clinician/technician contact) | 1) & 2), 8 weeks / 6 lessons                                | 1) & 2), Predominantly self-help                           | 1) total time spent by the technician (mean, SD, 61.0 mins, 9.8) per person, 2) total time spent by clinician (mean, SD, 60.5 mins, 19.0) per person | 1) Provide encouragement and support, respond to general questions by referring to the material of the program. No clinical advice, 2) active engagement in treatment, including goal setting, problem solving, discussion of strategies for overcoming hurdles to progress | 1) no prior experience with research programs, no qualifications in health care or counseling, no clinical duties in her usual role, 2) qualified and registered psychiatrist | 1) & 2), CBT |

|                      |                   |                                                                                     |                                                                                 |                              |                                                                                  |                                                                                                                                                                                                                |                                                                                                                                                                                                                                                                                                                                             |                                  |              |
|----------------------|-------------------|-------------------------------------------------------------------------------------|---------------------------------------------------------------------------------|------------------------------|----------------------------------------------------------------------------------|----------------------------------------------------------------------------------------------------------------------------------------------------------------------------------------------------------------|---------------------------------------------------------------------------------------------------------------------------------------------------------------------------------------------------------------------------------------------------------------------------------------------------------------------------------------------|----------------------------------|--------------|
| Titov (2011) [88]    | Wellbeing Program | 1) Internet-based CBT<br>2) waiting list                                            | 1) Online intervention, contact to clinician via instant messaging or telephone | 10 weeks / 8 modules         | Predominantly self-help                                                          | The mean total therapist time per Treatment group participant was 84.76 min (SD = 50.37 min) including monitoring of the discussion forum, sending and reading instant messages, and telephoning participants. | 1) Reinforcement of progress; 2) a summary of the key skills described in the Lesson for that week and encouraging practice of homework tasks; 3) normalizing difficulties with treatment; 4) encouragement to continue with the program, and; 5) answering questions and providing feedback to participants about their use of the skills. | clinical psychologist            | CBT          |
| Torkan (2014) [89]   | ND                | 1) Positive imagery cognitive bias modification<br>2) non-imagery control condition | 1) & 2), Computer-delivered intervention                                        | 1 week / 7 sessions          | Self-administered therapy                                                        | Self-administered therapy                                                                                                                                                                                      | Self-administered therapy                                                                                                                                                                                                                                                                                                                   | Self-administered therapy        | 1) CBM       |
| Vernmark (2010) [90] | ND                | 1) Email therapy<br>2) internet-based CBT<br>3) waiting list                        | 1) & 2), Online Intervention                                                    | 1) & 2), 8 weeks / 8 modules | 1) Predominantly therapist-administered intervention, 2) predominantly self-help | 1) The total average time spent by each therapist was 509 min (SD =176, range:171–890) per participant,                                                                                                        | 1) providing psychotherapy by email, 2) providing passwords to text modules, reinforcement of progress                                                                                                                                                                                                                                      | 1) & 2), psychology MSc students | 1) & 2), CBT |

|                     |                                                                                      |                                                                                     |                                                                                                    |                               |                                  |                                                                                                                                              |                                                                                                                                                                                    |                                                                                     |              |
|---------------------|--------------------------------------------------------------------------------------|-------------------------------------------------------------------------------------|----------------------------------------------------------------------------------------------------|-------------------------------|----------------------------------|----------------------------------------------------------------------------------------------------------------------------------------------|------------------------------------------------------------------------------------------------------------------------------------------------------------------------------------|-------------------------------------------------------------------------------------|--------------|
|                     |                                                                                      |                                                                                     |                                                                                                    |                               |                                  | 2) Each therapist spent an average of 53 minutes per participant (SD = 28, range 10–165) for the whole self-help treatment.                  |                                                                                                                                                                                    |                                                                                     |              |
| Watkins (2012) [91] | ND                                                                                   | 1) Cognitive bias modification plus TAU, 2) relaxation training plus TAU<br>3) TAU  | 1)CD-ROM (with exercises), telephone                                                               | 8 weeks / ND                  | Predominantly self-help          | ND                                                                                                                                           | during the telephone sessions the trainer provided feedback, guidance, and encouragement to ensure accurate use of the exercise, monitored progress and scheduled regular progress | graduate level psychologists or postdoctoral psychologists or clinical psychologist | CBM          |
| Watts (2013) [92]   | The Sadness Program (originally), but the title was changed to The Get Happy Program | 1) Mobile-based intervention (via an application)<br>2) computer-based intervention | 1) Access to intervention via app (mobile phone or iPad)<br>2) Access to intervention via computer | 1) & 2), 8 weeks / 6 sessions | 1) & 2), Predominantly self-help | 1) & 2), The mean clinician time spent per participant was 4.1 minutes (SD= 4.63) and the mean technician time spent per participant was 6.4 | 1) & 2), ND                                                                                                                                                                        | 1) & 2), ND                                                                         | 1) & 2), CBT |

|                      |                                                                                                      |                                                                                                                                                     |                                                    |                                                                              |                                  |                           |                                       |                                       |                                          |
|----------------------|------------------------------------------------------------------------------------------------------|-----------------------------------------------------------------------------------------------------------------------------------------------------|----------------------------------------------------|------------------------------------------------------------------------------|----------------------------------|---------------------------|---------------------------------------|---------------------------------------|------------------------------------------|
|                      |                                                                                                      |                                                                                                                                                     |                                                    |                                                                              |                                  | minutes (SD=5.38)         |                                       |                                       |                                          |
| Williams (2013) [93] | Sadness Program in conjunction with cognitive bias modification (OxIGen = Oxford Imagery Generation) | 1) imagery-focused cognitive bias modification plus internet-based CBT<br>2) waiting list                                                           | 1) Online interventions (CBM, CBT)                 | 11 weeks / 7 CBM sessions plus 6 CBT sessions                                | Self-administered therapy        | Self-administered therapy | Self-administered therapy             | Self-administered therapy             | 1) CBM, CBT                              |
| Williams (2015) [94] | CBM (the program is labelled OXIGen in the trial registration) plus Sadness Program                  | 1) Positive imagery cognitive bias modification plus internet-based CBT<br>2) control cognitive bias modification condition plus internet-based CBT | 1) & 2), Online interventions (CBM, CBT)           | 1) & 2), 11 weeks / 7 active/control CBM sessions plus 6 CBT sessions        | 1) & 2), Predominantly self-help | 1) & 2), ND               | 1) & 2), addressing patients' queries | 1) & 2), doctoral level psychologists | 1) CBM plus CBT, 2) control CBM plus CBT |
| Wright (2005) [95]   | ND                                                                                                   | 1) Blended cognitive therapy<br>2) face-to-face cognitive therapy<br>3) waiting list                                                                | 1) Computer-delivered intervention (at study site) | 8 weeks / 9 face-to-face session followed immediately by 8 computer sessions | Blended treatment                | Blended treatment         | Blended treatment                     | Blended treatment                     | 1) Cognitive therapy (or CBT)            |

|                                                                                                                                                                                          |          |                                                                                                                                                                                 |                              |                       |                                                          |                   |                                                                                                 |                                                                                                         |                                       |
|------------------------------------------------------------------------------------------------------------------------------------------------------------------------------------------|----------|---------------------------------------------------------------------------------------------------------------------------------------------------------------------------------|------------------------------|-----------------------|----------------------------------------------------------|-------------------|-------------------------------------------------------------------------------------------------|---------------------------------------------------------------------------------------------------------|---------------------------------------|
| Zagorscak (2018) [96]                                                                                                                                                                    | ND       | 1) Internet-based CBT plus standardized, automated feedback and contact on demand<br>2) internet-based CBT plus semistandardized e-mail feedback                                | 1) & 2), Online intervention | 6 weeks / 7 modules   | 1) Self-administered therapy, 2) Predominantly self-help | 1) & 2), ND       | 1) answering on-demand messages, 2) written feedback after each completed module (personalized) | 1) members of research team, 2) counselors holding either a bachelor's or master's degree in psychology | 1) ,2) CBT                            |
| Zwerenz (2017) [97]                                                                                                                                                                      | Deprexis | 1) Blended treatment (inpatient face-to-face sessions plus internet-based CBT), 2) Active control group (inpatient face-to-face sessions plus online information on depression) | 1) Online intervention       | 12 weeks / 12 modules | Blended treatment                                        | Blended treatment | Blended treatment                                                                               | Blended treatment                                                                                       | 1) CBT                                |
| Zwerenz (2017) [31]                                                                                                                                                                      | ND       | 1) Psychodynamic web-based intervention plus mindfulness exercises<br>2) waiting list                                                                                           | 1) Online intervention       | 10 weeks / 10 modules | Predominantly self-help                                  | ND                | providing encouraging feedback                                                                  | trained psychologist                                                                                    | 1) Psychodynamic therapy, mindfulness |
| <b>13 further published trials were identified in the course of the search update (August 2020) in the Cochrane Central Register of Controlled Trials. Publications are listed below</b> |          |                                                                                                                                                                                 |                              |                       |                                                          |                   |                                                                                                 |                                                                                                         |                                       |
| Dennis (2020) [98]                                                                                                                                                                       | ND       | 1) Telephone interpersonal psychotherapy + locally available standard postpartum care (including postpartum depression service), 2) locally available standard postpartum       | 1) Telephone-delivered       | 12 weeks / 12 modules | 1) Predominantly therapist-administered intervention     | ND                | providing interpersonal therapy via telephone                                                   | seven registered female nurses based in Toronto were trained to provide the IPT intervention.           | 1) IPT                                |

|                     |                     |                                                                                                                                                         |                              |                          |                                  |                                                              |                                                                                                                                                                                                                                                                                                                   |                              |                                              |
|---------------------|---------------------|---------------------------------------------------------------------------------------------------------------------------------------------------------|------------------------------|--------------------------|----------------------------------|--------------------------------------------------------------|-------------------------------------------------------------------------------------------------------------------------------------------------------------------------------------------------------------------------------------------------------------------------------------------------------------------|------------------------------|----------------------------------------------|
|                     |                     | care (including postpartum depression service)                                                                                                          |                              |                          |                                  |                                                              |                                                                                                                                                                                                                                                                                                                   |                              |                                              |
| Flygare (2020) [99] | ND                  | 1) Internet-based CBT, 2) online psychoeducation control condition                                                                                      | 1) Online intervention       | 8 weeks / 8 modules      | 1) Predominantly self-help       | ND                                                           | The psychologist gave feedback on completed homework, answered questions and gave access to the next module in their replies. Feedback on homework in the ICBT-group were typically written to help the participant to understand and to use the strategies in behavioral activation and cognitive restructuring. | psychologists                | 1) CBT                                       |
| Gili (2020) [100]   | ND                  | 1) Internet-based mindfulness program, 2) internet-based positive affect promotion program 3) internet-based healthy lifestyle program, 4) improved TAU | 1) & 2), Online intervention | 4 to 8 weeks / 4 modules | 1) & 2), Predominantly self-help | 1) & 2), 90 f2f session at the beginning of the intervention | 1) & 2), The aim of this session was to explain the program structure and main components of treatment and to motivate participants for change                                                                                                                                                                    | ND                           | 1) Mindfulness, 2) Positive affect promotion |
| Hur (2018) [101]    | Todac<br>Todac (TT) | 1) App-based cognitive restructuring, 2) app-based mood chart control group                                                                             | 1) Online intervention       | 3 weeks / ND             | 1) Self-administered therapy     | 1) Self-administered therapy                                 | 1) Self-administered therapy                                                                                                                                                                                                                                                                                      | 1) Self-administered therapy | 1) CT (especially cognitive)                 |



|                        |           |                                        |                        |                     |                              |                              |                                                                                                                                                                                                                                                                                                                                                                                                                                                                                                                      |                              |                |
|------------------------|-----------|----------------------------------------|------------------------|---------------------|------------------------------|------------------------------|----------------------------------------------------------------------------------------------------------------------------------------------------------------------------------------------------------------------------------------------------------------------------------------------------------------------------------------------------------------------------------------------------------------------------------------------------------------------------------------------------------------------|------------------------------|----------------|
|                        |           |                                        |                        |                     |                              |                              |                                                                                                                                                                                                                                                                                                                                                                                                                                                                                                                      |                              | restructuring) |
| Jannati (2020) [102]   | Happy Mom | 1) App-based CBT, 2) waiting list      | 1) Online intervention | 8 weeks / 8 modules | 1) Self-administered therapy | 1) Self-administered therapy | 1) Self-administered therapy                                                                                                                                                                                                                                                                                                                                                                                                                                                                                         | 1) Self-administered therapy | 1) CBT         |
| Johansson (2019) [108] | ND        | 1) Internet-based CBT, 2) waiting list | 1) Online intervention | 8 weeks / 8 modules | 1) Predominantly self-help   | ND                           | The therapist gave text-based feedback (within a 24-hour time frame) focusing on encouraging the participants work and keeping the participant focused on the program. If participants did not report their assignments, the therapist phoned the participants and attempted to problem-solve how participants could adhere better to the treatment protocol. If the assignment was not performed as expected the clinician made an assessment if to continue with the next weekly module or to repeat the previous. | two licensed psychologists   | 1) CBT         |

|                       |              |                                                                                         |                                                             |                                                                                                                    |                                                                                                                                                 |                                                                                                                                                                                                                                                                                                                     |                                                                                                                                                                                                                                                                                                                                                                                                                                                                                                                                                                                                  |                                                                                                                                                           |              |
|-----------------------|--------------|-----------------------------------------------------------------------------------------|-------------------------------------------------------------|--------------------------------------------------------------------------------------------------------------------|-------------------------------------------------------------------------------------------------------------------------------------------------|---------------------------------------------------------------------------------------------------------------------------------------------------------------------------------------------------------------------------------------------------------------------------------------------------------------------|--------------------------------------------------------------------------------------------------------------------------------------------------------------------------------------------------------------------------------------------------------------------------------------------------------------------------------------------------------------------------------------------------------------------------------------------------------------------------------------------------------------------------------------------------------------------------------------------------|-----------------------------------------------------------------------------------------------------------------------------------------------------------|--------------|
| Kooistra (2019) [103] | ND           | 1) Blended CBT, 2) f2f CBT                                                              | 1) Online intervention                                      | 10 weeks / 10 f2f sessions and 9 web-based sessions                                                                | Blended treatment                                                                                                                               | Blended treatment                                                                                                                                                                                                                                                                                                   | Blended treatment                                                                                                                                                                                                                                                                                                                                                                                                                                                                                                                                                                                | Blended treatment                                                                                                                                         | 1) CBT       |
| Mohr (2019) [33]      | ThinkFeel-Do | 1) Stepped care program (1st step iCBT, 2nd step telephone CBT), 2) telephone CBT alone | 1) Online intervention, 2) telephone-delivered intervention | 1) & 2), duration of the treatment depended on treatment success, but treatment lasted up to a maximum of 20 weeks | 1) Predominantly self-help, after stepping up the intervention was therapist-administered, 2) predominantly therapist-administered intervention | 1) Coaches began with a 30–40 min engagement phone call, followed by weekly 10–15 min calls and 2–3 secure messages per week through the ThinkFeelDo site. After 3 weeks, patients could elect to move to messaging only or continuing to use telephone coaching on an as-needed basis.; 2) spoke weekly with their | 1) The iCBT coaching protocol was manualized (Tomasino, Lattie, Wilson, & Mohr, 2017) and based on the supportive accountability and efficiency models (Mohr, Cuijpers, & Lehman, 2011; Schueller, Tomasino, & Mohr, 2016). [...] The initial session will be conducted via telephone and will last about 30 - 45 minutes long in order to facilitate engagement with the coach and the program, with subsequent sessions of approximately 5-15 minutes per week. [...] Coaching sessions will follow a motivational interviewing based format focused on increasing participants' motivation to | 1) & 2), 5 PhD level clinical psychologists, 2 licensed clinical social workers, and a master's level therapist, all of whom were trained CBT therapists. | 1) & 2), CBT |

|                       |                   |                                                                       |                              |                      |                                  |                                                                                                                                                                               |                                                                                                                                                                                        |                                                                                                      |              |
|-----------------------|-------------------|-----------------------------------------------------------------------|------------------------------|----------------------|----------------------------------|-------------------------------------------------------------------------------------------------------------------------------------------------------------------------------|----------------------------------------------------------------------------------------------------------------------------------------------------------------------------------------|------------------------------------------------------------------------------------------------------|--------------|
|                       |                   |                                                                       |                              |                      |                                  | assigned therapist for 45–50 min.                                                                                                                                             | continue logging in to the website.; 2) delivering CBT via telephone                                                                                                                   |                                                                                                      |              |
| Oehler (2020) [104]   | iFightDepression  | 1) Internet-based CBT, 2) progressive muscle relaxation control group | 1) Online intervention       | 6 weeks / 6 modules  | 1) Predominantly self-help       | The mean time spent on the 5 guidance and study calls was 38.5 (SD 9.9) min per participant for the iFD group and 28.9 (SD 15.0) min per participant for the PMR group, [...] | The focus of the guidance calls was to motivate the participants rather than discuss the intervention content.                                                                         | psychologists and psychotherapists                                                                   | 1) CBT       |
| Pfeiffer (2020) [105] | Beating the blues | 1) Peer-supported cCBT, 2) enhanced usual care                        | 1) Online intervention       | 13 weeks / 8 modules | 1) Predominantly self-help       | ND                                                                                                                                                                            | [...] to discuss progress and barriers to completing cCBT modules and to provide general peer support for managing depression.                                                         | trained and supervised peer support specialists                                                      | 1) CBT       |
| Pihlaja (2020) [106]  | ND                | 1) iCBT plus add-on telephone support, 2) iCBT only                   | 1) & 2), Online intervention | ND / 7 modules       | 1) & 2), Predominantly self-help | 1) 73.37 (48.95), 5-165 => mean duration of phone calls, 2) 1.95 (6.11), 0-30 => mean                                                                                         | 1) & 2), [...]; patients receive encouragement to write to the therapist any time with their questions or concerns. The therapist comments on the completed tasks, offering praise and | 1) & 2), All 5 therapists involved in this trial were clinical psychologists employed by HUS and had | 1) & 2), CBT |

|                      |                       |                                                                            |                        |              |                            |                                                                                                                             |                                                                                                                                                                                                                                                                                                                                                                                                                                                                                                                             |                                                                                                                    |        |
|----------------------|-----------------------|----------------------------------------------------------------------------|------------------------|--------------|----------------------------|-----------------------------------------------------------------------------------------------------------------------------|-----------------------------------------------------------------------------------------------------------------------------------------------------------------------------------------------------------------------------------------------------------------------------------------------------------------------------------------------------------------------------------------------------------------------------------------------------------------------------------------------------------------------------|--------------------------------------------------------------------------------------------------------------------|--------|
|                      |                       |                                                                            |                        |              |                            | duration of phone calls                                                                                                     | support for the patient. ;1)[...] In addition to the standard HUS-iCBT, the add-on STS intervention group [...]selection of individual goals took place. The tasks and themes of each module were discussed in the calls that followed each module. Support was individually tailored and followed the principles of the model of supportive accountability [33], [...] According to this model, combining elements of support and accountability with a legitimized and trustworthy relationship increases adherence.[...] | at least 2 years of work experience with depressed patients.                                                       |        |
| Richards (2020) [34] | Space from Depression | 1) Immediate iCBT (step 2 within a stepped care approach), 2) waiting list | 1) Online intervention | 8 weeks / ND | 1) Predominantly self-help | PWPs were instructed to provide six online reviews (15 min per participant per review) over the 8-week intervention period. | During the reviews, PWPs provided feedback to clients based on their work from week-to-week (e.g. modules completed, tools used, shared journal entries) and encouragement in order to promote meaningful engagement                                                                                                                                                                                                                                                                                                        | [...] PWPs, who are psychology graduates specifically trained in the provision of low intensity CBT interventions. | 1) CBT |

|                    |                       |                                                                                     |                                                          |                       |                                    |                                    |                                    |                                    |              |
|--------------------|-----------------------|-------------------------------------------------------------------------------------|----------------------------------------------------------|-----------------------|------------------------------------|------------------------------------|------------------------------------|------------------------------------|--------------|
|                    |                       |                                                                                     |                                                          |                       |                                    |                                    | with the programme.                |                                    |              |
| Welch (2019) [107] | Good Days Ahead (GDA) | 1) eCBT plus transcranial direct current stimulation, 2) eCBT plus sham stimulation | 1) & 2), Computer-delivered intervention (at study site) | 1) & 2), 4 weeks / ND | 1) & 2), Self-administered therapy | 1) & 2), Self-administered therapy | 1) & 2), Self-administered therapy | 1) & 2), Self-administered therapy | 1) & 2), CBT |

**Note.** <sup>a</sup>Newman et al. [109]; ND = No data; SD = Standard deviation; CBT = Cognitive behavioral therapy; BA = Behavioral activation; CBM = Cognitive bias modification; PP = Positive psychology; CF = Cognition focused; CT = Cognitive therapy; PA = physical activity; PST = Problem solving therapy; IPT = interpersonal therapy; f2f = Face-to-face; TAU = Treatment as usual; M. Sc. = Master of Science.
