# Supplementary material for: Evidence on Technology-Based Psychological Interventions in Diagnosed Depression: Systematic Review
Source: PubMed Central journal article supplement (PMC7904404; doi:10.2196/21700), 2021-02-10
Supplement: mental_v8i2e21700_app4.pdf [file mental_v8i2e21700_app4.pdf]

**Appendix 4.** Technologies for intervention delivery in TBI arms (n=107).

| Descriptor of applied technical medium(s)                                                        | Number of identified TBI arms | Proportion (in %) on all TBI-arms |
|--------------------------------------------------------------------------------------------------|-------------------------------|-----------------------------------|
| <b>At least one interventional component was delivered via the internet</b>                      | <b>80</b>                     | <b>75</b>                         |
| Internet-based intervention                                                                      | 58                            | 54                                |
| Internet-based intervention + telephone support                                                  | 18                            | 17                                |
| Internet-based intervention + CD-ROM + telephone support                                         | 2                             | 2                                 |
| Internet-based intervention + CD-ROM                                                             | 2                             | 2                                 |
| <b>At least one interventional component was delivered via telephone (eg, telephone support)</b> | <b>34</b>                     | <b>32</b>                         |
| Telephone                                                                                        | 12                            | 11                                |
| Internet-based intervention + telephone support                                                  | 18                            | 17                                |
| Internet-based intervention + CD-ROM + telephone support                                         | 2                             | 2                                 |
| Telephone + DVD                                                                                  | 1                             | 1                                 |
| CD-ROM + telephone                                                                               | 1                             | 1                                 |
| <b>Others</b>                                                                                    | <b>13</b>                     | <b>12</b>                         |
| Mobile phone (text messages)                                                                     | 2                             | 2                                 |
| Videoconferencing                                                                                | 3                             | 3                                 |
| Offline computer program                                                                         | 8                             | 7                                 |

**Note.** Color highlighting of lines that were considered twice in different categories of applied technical mediums.
