# Supplementary material for: Evidence on Technology-Based Psychological Interventions in Diagnosed Depression: Systematic Review
Source: PubMed Central journal article supplement (PMC7904404; doi:10.2196/21700), 2021-02-10
Supplement: mental_v8i2e21700_app5.pdf [file mental_v8i2e21700_app5.pdf]

**Appendix 5.** Therapeutic rationales of TBI arms (n=107) in included studies.

| <b>Therapeutic rationale of TBIs</b>                                                                                                   | <b>Number of identified TBI-arms</b> | <b>Proportion (in %) on all TBI-arms*</b> |
|----------------------------------------------------------------------------------------------------------------------------------------|--------------------------------------|-------------------------------------------|
| Cognitive behavioral treatment approaches (behavioral activation [n=12], cognitive behavioral therapy [n=70], cognitive therapy [n=3]) | 85                                   | 79                                        |
| Cognitive bias modification                                                                                                            | 7                                    | 7                                         |
| Mindfulness                                                                                                                            | 4                                    | 4                                         |
| Problem solving therapy                                                                                                                | 3                                    | 3                                         |
| Psychodynamic therapy                                                                                                                  | 3                                    | 3                                         |
| Affect regulation training                                                                                                             | 2                                    | 2                                         |
| Acceptance and commitment therapy                                                                                                      | 1                                    | 1                                         |
| Cognition focused treatment (ie, emotionally neutral memory recall)                                                                    | 1                                    | 1                                         |
| Intensive clinical management                                                                                                          | 1                                    | 1                                         |
| Interpersonal psychotherapy                                                                                                            | 1                                    | 1                                         |
| Positive affect promotion                                                                                                              | 1                                    | 1                                         |
| Positive psychology                                                                                                                    | 1                                    | 1                                         |
| Social rhythm therapy                                                                                                                  | 1                                    | 1                                         |

**Note.** \*Overall percentage exceeds 100%, since three trials combined rationales (eg, psychodynamic therapy and mindfulness), and were thus considered repeatedly.
