# Supplementary material for: Evidence on Technology-Based Psychological Interventions in Diagnosed Depression: Systematic Review
Source: JMIR Ment Health. 2021 Feb 10;8(2):e21700. doi: 10.2196/21700 (PMC7904404; doi:10.2196/21700)
Supplement: Multimedia Appendix 6 [file mental_v8i2e21700_app6.pdf]

## Appendix 6. Report of negative events.

| Study ID (author / year / reference) | Deterioration | Adverse events | Severe adverse events | Novel Symptoms | Dropout | Nonresponse | Unwanted events |
|--------------------------------------|---------------|----------------|-----------------------|----------------|---------|-------------|-----------------|
| Agyapong (2017) [35]                 |               |                |                       |                |         |             |                 |
| Andersson (2013) [36]                |               |                |                       |                |         |             |                 |
| Arjadi (2018) [37]                   |               |                |                       |                |         |             |                 |
| Berger (2011) [38]                   |               |                |                       |                |         |             |                 |
| Berger (2018) [39]                   |               |                |                       |                |         |             |                 |
| Blackwell (2015) [40]                |               |                |                       |                |         |             |                 |
| Bowers (1993) [41]                   |               |                |                       |                |         |             |                 |
| Carlbring (2013) [42]                |               |                |                       |                |         |             |                 |
| Celano (2017) [43]                   |               |                |                       |                |         |             |                 |
| Choi (2012) [44]                     |               |                |                       |                |         |             |                 |
| Choi (2014) [45]                     |               |                |                       |                |         |             |                 |
| Corruble (2016) [46]                 |               |                |                       |                |         |             |                 |
| Egede (2015) [47]                    |               |                |                       |                |         |             |                 |
| Forand (2018) [48]                   |               |                |                       |                |         |             |                 |
| Forsell (2017) [49]                  |               |                |                       |                |         |             |                 |
| Gilbody (2016) [50]                  |               |                |                       |                |         |             |                 |
| Graaf (2009) [51]                    |               |                |                       |                |         |             |                 |
| Holländare (2011) [16]               |               |                |                       |                |         |             |                 |
| Hunkeler (2012) [52]                 |               |                |                       |                |         |             |                 |
| Johansson (2012) [53]                |               |                |                       |                |         |             |                 |
| Johansson (2012) [54]                |               |                |                       |                |         |             |                 |
| Johansson (2013) [55]                |               |                |                       |                |         |             |                 |
| Kenter (2016) [32]                   |               |                |                       |                |         |             |                 |
| Kessler (2009) [56]                  |               |                |                       |                |         |             |                 |
| Kivi (2014) [57]                     |               |                |                       |                |         |             |                 |
| Kok (2015) [29]                      |               |                |                       |                |         |             |                 |
| Hirsch (2018) [58]                   |               |                |                       |                |         |             |                 |

|                           |  |  |  |  |  |  |  |
|---------------------------|--|--|--|--|--|--|--|
| Lam (2013) [59]           |  |  |  |  |  |  |  |
| Lang (2012) [60]          |  |  |  |  |  |  |  |
| Lappalainen (2015) [61]   |  |  |  |  |  |  |  |
| Lindner (2014) [62]       |  |  |  |  |  |  |  |
| Löbner (2018) [63]        |  |  |  |  |  |  |  |
| Luxton (2016) [64]        |  |  |  |  |  |  |  |
| Ly (2014) [65]            |  |  |  |  |  |  |  |
| Ly (2015) [66]            |  |  |  |  |  |  |  |
| Mantani (2017) [67]       |  |  |  |  |  |  |  |
| Meyer (2015) [68]         |  |  |  |  |  |  |  |
| Milgrom (2016) [69]       |  |  |  |  |  |  |  |
| Mohr (2011) [70]          |  |  |  |  |  |  |  |
| Mohr (2012) [71]          |  |  |  |  |  |  |  |
| Mohr (2013) [72]          |  |  |  |  |  |  |  |
| Montero-Marín (2016) [73] |  |  |  |  |  |  |  |
| Nakao (2018) [74]         |  |  |  |  |  |  |  |
| Nyström (2017) [75]       |  |  |  |  |  |  |  |
| O'Mahen (2014) [76]       |  |  |  |  |  |  |  |
| Perini (2009) [17]        |  |  |  |  |  |  |  |
| Reins (2019) [77]         |  |  |  |  |  |  |  |
| Ren (2016) [78]           |  |  |  |  |  |  |  |
| Richards (2013) [79]      |  |  |  |  |  |  |  |
| Rollman (2018) [80]       |  |  |  |  |  |  |  |
| Rosso (2017) [81]         |  |  |  |  |  |  |  |
| Sandoval (2017) [82]      |  |  |  |  |  |  |  |
| Schlicker (2018) [30]     |  |  |  |  |  |  |  |
| Schuver (2016) [83]       |  |  |  |  |  |  |  |
| Selmi (1990) [84]         |  |  |  |  |  |  |  |
| Smith (2017) [85]         |  |  |  |  |  |  |  |
| Steinmann (2020) [15]     |  |  |  |  |  |  |  |
| Thase (2018) [86]         |  |  |  |  |  |  |  |
| Titov (2010) [87]         |  |  |  |  |  |  |  |

|                                                                                                                                                                                          |  |  |  |  |  |  |  |
|------------------------------------------------------------------------------------------------------------------------------------------------------------------------------------------|--|--|--|--|--|--|--|
| Titov (2011) [88]                                                                                                                                                                        |  |  |  |  |  |  |  |
| Torkan (2014) [89]                                                                                                                                                                       |  |  |  |  |  |  |  |
| Vernmark (2010) [90]                                                                                                                                                                     |  |  |  |  |  |  |  |
| Watkins (2012) [91]                                                                                                                                                                      |  |  |  |  |  |  |  |
| Watts (2013) [92]                                                                                                                                                                        |  |  |  |  |  |  |  |
| Williams (2013) [93]                                                                                                                                                                     |  |  |  |  |  |  |  |
| Williams (2015) [94]                                                                                                                                                                     |  |  |  |  |  |  |  |
| Wright (2005) [95]                                                                                                                                                                       |  |  |  |  |  |  |  |
| Zagorscak (2018) [96]                                                                                                                                                                    |  |  |  |  |  |  |  |
| Zwerenz (2017) [97]                                                                                                                                                                      |  |  |  |  |  |  |  |
| Zwerenz (2017) [31]                                                                                                                                                                      |  |  |  |  |  |  |  |
| <b>13 further published trials were identified in the course of the search update (August 2020) in the Cochrane Central Register of Controlled Trials. Publications are listed below</b> |  |  |  |  |  |  |  |
| Dennis (2020) [98]                                                                                                                                                                       |  |  |  |  |  |  |  |
| Flygare (2020) [99]                                                                                                                                                                      |  |  |  |  |  |  |  |
| Gili (2020) [100]                                                                                                                                                                        |  |  |  |  |  |  |  |
| Hur (2018) [101]                                                                                                                                                                         |  |  |  |  |  |  |  |
| Jannati (2020) [102]                                                                                                                                                                     |  |  |  |  |  |  |  |
| Johansson (2019) [108]                                                                                                                                                                   |  |  |  |  |  |  |  |
| Kooistra (2019) [103]                                                                                                                                                                    |  |  |  |  |  |  |  |
| Mohr (2019) [33]                                                                                                                                                                         |  |  |  |  |  |  |  |
| Oehler (2020) [104]                                                                                                                                                                      |  |  |  |  |  |  |  |
| Pfeiffer (2020) [105]                                                                                                                                                                    |  |  |  |  |  |  |  |
| Pihlaja (2020) [106]                                                                                                                                                                     |  |  |  |  |  |  |  |
| Richards (2020) [34]                                                                                                                                                                     |  |  |  |  |  |  |  |
| Welch (2019) [107]                                                                                                                                                                       |  |  |  |  |  |  |  |

**Note.** Color highlighting of cells indicates whether or not information concerning different categories of negative events were reported in included studies: green = report concerning information on specific category of negative events (see first line); red = no report concerning information on specific category of negative events (see first line); yellow (only applied for dropouts) = report of other kind of dropouts (eg, withdrawals from study, treatment completers as defined by authors) that did not capture dropouts from treatment (ie, inverse of the completion rate, etc.).
